# Supplementary material for: HIV prevalence among men who have sex with men following the implementation of the HIV preventive guideline in Tanzania: respondent-driven sampling survey
Source: PubMed Central journal article supplement — BMJ Open. 2020 Oct 5;10(10):e036460. doi: 10.1136/bmjopen-2019-036460 (PMC7537429; doi:10.1136/bmjopen-2019-036460), 2020-10-05
Supplement: bmjopen-2019-036460.draft_revisions.pdf [file bmjopen-2019-036460.draft_revisions.pdf]

# BMJ Open

BMJ Open is committed to open peer review. As part of this commitment we make the peer review history of every article we publish publicly available.

When an article is published we post the peer reviewers' comments and the authors' responses online. We also post the versions of the paper that were used during peer review. These are the versions that the peer review comments apply to.

The versions of the paper that follow are the versions that were submitted during the peer review process. They are not the versions of record or the final published versions. They should not be cited or distributed as the published version of this manuscript.

BMJ Open is an open access journal and the full, final, typeset and author-corrected version of record of the manuscript is available on our site with no access controls, subscription charges or pay-per-view fees (<http://bmjopen.bmj.com>).

If you have any questions on BMJ Open's open peer review process please email [info.bmjopen@bmj.com](mailto:info.bmjopen@bmj.com)

# BMJ Open

## HIV Prevalence among Men Who Have Sex with Men following the Implementation of the HIV Preventive Guideline in Tanzania: Respondent Driven Sampling Survey

|                               |                                                                                                                                                                                                                                                                                                                                                                                                                                                                                                                                                                                                                                                                                                                                                                                                                                                                                                                                                                                                                                                                        |
|-------------------------------|------------------------------------------------------------------------------------------------------------------------------------------------------------------------------------------------------------------------------------------------------------------------------------------------------------------------------------------------------------------------------------------------------------------------------------------------------------------------------------------------------------------------------------------------------------------------------------------------------------------------------------------------------------------------------------------------------------------------------------------------------------------------------------------------------------------------------------------------------------------------------------------------------------------------------------------------------------------------------------------------------------------------------------------------------------------------|
| Journal:                      | <i>BMJ Open</i>                                                                                                                                                                                                                                                                                                                                                                                                                                                                                                                                                                                                                                                                                                                                                                                                                                                                                                                                                                                                                                                        |
| Manuscript ID                 | bmjopen-2019-036460                                                                                                                                                                                                                                                                                                                                                                                                                                                                                                                                                                                                                                                                                                                                                                                                                                                                                                                                                                                                                                                    |
| Article Type:                 | Original research                                                                                                                                                                                                                                                                                                                                                                                                                                                                                                                                                                                                                                                                                                                                                                                                                                                                                                                                                                                                                                                      |
| Date Submitted by the Author: | 18-Dec-2019                                                                                                                                                                                                                                                                                                                                                                                                                                                                                                                                                                                                                                                                                                                                                                                                                                                                                                                                                                                                                                                            |
| Complete List of Authors:     | Alexander Ishungisa, Mwijage; Muhimbili University of Health and Allied Sciences, Behavioral Sciences; Muhimbili University of Health and Allied Sciences, Medical Botany, Plant Breeding and Agronomy<br>Likindikoki, Samuel; Muhimbili University of Health and Allied Sciences<br>Moen, Kare; University of Oslo<br>Leyna, Germana; Muhimbili University of Health and Allied Sciences, Public Health and Social Sciences<br>Makyao, Neema; Tanzania National AIDS control Program<br>Meyrowitsch, Dan; University of Copenhagen, Global Health Section<br>Lange, Theis; University of Copenhagen, Section of Biostatistics<br>Mmbaga, Elia John; Muhimbili Univ Hlth , Epidemiology and Biostatistics;<br>Universitetet i Oslo Avdeling for samfunnsmedisin, Community Medicine and Global Health<br>Mizinduko, Mucho; Muhimbili University of Health and Allied Sciences, Epidemiology<br>Thomas Leshabar, Melkzedek ; Muhimbili University College of Health Sciences, Behavioral Sciences<br>Ramadhan, Angela; Kilimanjaro Christian Medical University College |
| Keywords:                     | HIV & AIDS < INFECTIOUS DISEASES, Infection control < INFECTIOUS DISEASES, Public health < INFECTIOUS DISEASES, EPIDEMIOLOGY                                                                                                                                                                                                                                                                                                                                                                                                                                                                                                                                                                                                                                                                                                                                                                                                                                                                                                                                           |
|                               |                                                                                                                                                                                                                                                                                                                                                                                                                                                                                                                                                                                                                                                                                                                                                                                                                                                                                                                                                                                                                                                                        |

SCHOLARONE™  
Manuscripts

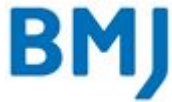

I, the Submitting Author has the right to grant and does grant on behalf of all authors of the Work (as defined in the below author licence), an exclusive licence and/or a non-exclusive licence for contributions from authors who are: i) UK Crown employees; ii) where BMJ has agreed a CC-BY licence shall apply, and/or iii) in accordance with the terms applicable for US Federal Government officers or employees acting as part of their official duties; on a worldwide, perpetual, irrevocable, royalty-free basis to BMJ Publishing Group Ltd ("BMJ") its licensees and where the relevant Journal is co-owned by BMJ to the co-owners of the Journal, to publish the Work in this journal and any other BMJ products and to exploit all rights, as set out in our [licence](#).

The Submitting Author accepts and understands that any supply made under these terms is made by BMJ to the Submitting Author unless you are acting as an employee on behalf of your employer or a postgraduate student of an affiliated institution which is paying any applicable article publishing charge ("APC") for Open Access articles. Where the Submitting Author wishes to make the Work available on an Open Access basis (and intends to pay the relevant APC), the terms of reuse of such Open Access shall be governed by a Creative Commons licence – details of these licences and which [Creative Commons](#) licence will apply to this Work are set out in our licence referred to above.

Other than as permitted in any relevant BMJ Author's Self Archiving Policies, I confirm this Work has not been accepted for publication elsewhere, is not being considered for publication elsewhere and does not duplicate material already published. I confirm all authors consent to publication of this Work and authorise the granting of this licence.

# HIV Prevalence among Men Who Have Sex with Men following the Implementation of the HIV Preventive Guideline in Tanzania: Respondent Driven Sampling Survey

Alexander Mwijage<sup>1</sup>, Kåre Moen<sup>2</sup>, Germana Henry Leyna<sup>3</sup>, Neema Makyo<sup>4</sup>, Angela Ramadhan<sup>4</sup>, Theis Lange<sup>5</sup>, Dan Wolf Meyrowitsch<sup>5</sup>, Mucho Mizinduko<sup>3</sup>, Samuel Likindikoki<sup>3</sup>, Melkzedek Thomas Leshabari<sup>1</sup>, Elia John Mmbaga<sup>2,3</sup>

<sup>1</sup>*Department of Behavioral Sciences, Muhimbili University of Health and Allied Sciences, Dar es Salaam, Tanzania,*

<sup>2</sup>*Department of Community Medicine and Global Health, Institute of Health and Society, University of Oslo, Norway,*

<sup>3</sup>*Department of Epidemiology and Biostatistics, Muhimbili University of Health and Allied Sciences, Dar es Salaam, Tanzania,*

<sup>4</sup>*Ministry of Health Community Development, Gender, Elderly and Children, Dodoma, Tanzania, and*

<sup>5</sup>*Department of Public Health, University of Copenhagen, Copenhagen, Denmark*

**Full contact information for corresponding author:**

**MUHAS, P.O BOX 56001, United Nations road, Dar es Salaam**

**Email: [mwijagealexander2014@yahoo.com](mailto:mwijagealexander2014@yahoo.com)**

**Phone: +255752194077**

## ABSTRACT

**Objectives:** To estimate the prevalence of HIV infection among men who have sex with men (MSM) in Dar es Salaam, Tanzania following nearly half a decade of implementation of the comprehensive guideline of HIV interventions for key populations (CHIP).

**Design:** A cross-sectional survey using respondent-driven sampling

**Setting:** Dar es Salaam, Tanzania's largest city.

**Participants:** Men who occasionally or regularly have sex with another man (men who have sex with men; MSM), aged 18 years and above and living in Dar es Salaam city.

**Primary outcome measure:** HIV prevalence was the primary outcome. Independent risk factors for HIV infection were examined using weighted logistics regression modelling.

**Results:** A total of 777 MSM with a mean age of 26 years took part in the study. The weighted HIV prevalence was 8.3% (95%CI: 6.3-10.9) as compared to 22.3% (95%CI: 18.7-26.4) observed in a similar survey in 2013. Half of the participants had had sex with more than 2 partners in the month preceding the survey. Among those who had engaged in transactional sex, 80% had used a condom during last anal sex with a paying partner. Participants aged 25 and above had 4 times higher odds of being infected than those aged 15-19. HIV infection was associated with multiple sexual partnerships (AOR, 3.0; 95%CI: 1.8-12.0), not having used condom during last sex with non-paying partner (AOR, 4.1; 95%CI: 1.4-7.8), and ever having engaged in group sex (AOR, 3.4; 95%CI: 1.7-13.6).

**Conclusion:** HIV prevalence among MSM in Dar es Salaam has decreased by more than half over the past 5 years, coinciding with implementation of the CHIP. It is nonetheless twice as high as that of men in the general population. To achieve the 2030 goal, behavioral change interventions and roll-out of new intervention measures such as pre-exposure prophylaxis are urgently needed.

**Keywords:** Men who have sex with men, HIV prevalence, sexual risk behaviors, Tanzania

### Strengths and limitations of this study

- This is the largest respondent driven sampling survey among MSM in Tanzania.
- Study participants were recruited from diverse strata of the population.
- The results were weighted to control for network size and clustering resulting from variations in selection probability and network sizes in respondent driven sampling
- Comparisons are made with HIV prevalence estimates generated in a methodologically comparable survey conducted before the launch of the CHIP.
- Data on sexual behavior is subject to social desirability bias.
- The study did not measure biological risk factors for HIV infection which might have provided more insight into the risk profile of this population.

### Background

Since 2004, the rate of HIV infection has been declining globally including in Tanzania [1]. The Tanzania HIV Indicator and Impact Surveys indicate that the HIV prevalence among persons aged 15-49 decreased from 7% in 2004 to 4.7% in 2016 [2, 3]. The observed decrease has been attributed to concerted efforts to promote condom use and to an improved HIV testing coverage with 90.9% linkage to antiretroviral therapy (ART) among those who test positive for HIV and 87.7% viral suppression [2].

While evidence of declining overall HIV infection rates have been mounting, populations at higher risk of HIV infection, such as MSM, have continued to carry a disproportionate burden of HIV in Africa and beyond. Studies from Africa have indicated that the HIV prevalence among MSM are 2 to 20 times higher than that in the general population [4-12]. Recent studies have estimated the HIV prevalence among MSM in Tanzania to range from 12.5% in Zanzibar to 22.3% in Dar es Salaam and 11.1% in Tanga [4, 6, 13]. Practices associated with increased risk of HIV, such as multiple sexual partnerships, unprotected anal

1  
2  
3 sex, group sex, alcohol and drug use, and commercial sex have been commonly reported among MSM [4,  
4  
5 9, 13-16]. A high prevalence of sexually transmitted infections, such as herpes simplex virus type 2, has  
6  
7 also been associated with high infection rates among MSM [4, 6, 10, 12, 14].  
8  
9

10 Populations at increased risk of HIV infection have been estimated to contribute up to 30% of new HIV  
11  
12 infections in sub-Saharan Africa, making it impossible to leave them behind if we are to achieve the  
13  
14 ambitious third sustainable development goal and end the HIV epidemic by 2030 [7, 17].  
15  
16

17 In 2014, Tanzania launched the CHIP coupled with training of healthcare workers and the embracement  
18  
19 of a multi-sectorial approach to control the HIV epidemic [18]. Nearly half a decade later, no study has  
20  
21 evaluated the state of the HIV epidemic in key populations. Given the notable decrease in HIV infection  
22  
23 rates in Tanzania's general population, it is important that the dynamic of the HIV epidemic is tracked  
24  
25 also in these populations as to inform government efforts aiming to achieve the 2030 goal [2]. This study  
26  
27 seeks to provide information on the prevalence of HIV and associated sexual behavior-related risk factors  
28  
29 among MSM in Dar es Salaam following nearly half a decade of implementation of CHIP.  
30  
31  
32  
33  
34

## 35 **METHODS**

### 36 **Design and setting**

37  
38 This was a cross sectional integrated bio-behavioral surveillance (IBBS) survey among MSM conducted  
39  
40 between October and December 2017 in Dar es Salaam, the largest city in Tanzania. The location was  
41  
42 chosen because it has a large population of MSM and a high prevalence of HIV, and also because  
43  
44 baseline data were available for comparison (i.e., data on HIV prevalence and associated risk factors  
45  
46 among MSM before the implementation of the CHIP started [19]). Dar es Salaam is a fast-growing city  
47  
48 and currently has a population of about 5 million. The estimated overall HIV prevalence among adults  
49  
50 aged 15-49 is 6.3% [2].  
51  
52  
53  
54  
55  
56  
57  
58  
59  
60

### **Study population**

MSM aged 18 and above were invited to participate in this survey. Participation required that the person had engaged in same-sex sex during the last 3 months preceding the survey. Also, participants needed to have had an address in, and lived in, Dar es Salaam for at least six months before recruitment commenced.

### **Sample size estimation**

The sample size aimed at achieving desired precision around point estimates for HIV infection among MSM. According to 2013 estimates for Dar es Salaam, the prevalence of HIV was 22% among MSM [4]. With a desired precision of 5%, taking into account a design effect (DEFF) of 3, based on the median DEFF found for key variables in similar RDS surveys in the region [5-9], the estimated sample size for this study was 759.

### **Sampling and recruitment**

Since there was no sampling frame for MSM, eligible study participants were recruited using respondent-driven sampling (RDS) [20]. RDS is a chain referral sampling method that incorporates a recruitment strategy to offset oversampling of certain population groups to minimize traditional snowballing bias [21]. Initially, selected members of the target population (referred to as “seeds”) refer other members of the same population to the study team for possible participation in a succession of waves until the desired sample size is achieved. Seeds were identified from different strata of MSM among our previous study contacts and through a meeting with the key population community advisory board. Characteristics that were taken into account in selection of seeds were age, socio-economic status, locality and sexual preference (preference for insertive or receptive anal sex).

### **Data collection tool and data collection procedures**



1  
2  
3 A questionnaire validated in previous IBBS surveys conducted by our research group and others was  
4 used in this study [4]. The questionnaire contained questions on socio-demographic characteristics and  
5 sexual practices and was administered in Swahili, the language spoken by all Tanzanians. Six seeds  
6 were identified and represented different groups of MSM. Participants were invited to a recruitment  
7 centre where they were provided with information about the study and asked if they would consent to  
8 participate in it. All study participants gave informed consent to take part in the research, and face-to-  
9 face interviews using Android tablets equipped with an Open Data Kit (ODK) for recording of data.  
10 Following the interviews, HIV pre-test counseling was carried out before participants were offered to  
11 test for HIV. All participants received health education and condoms after the interview and were  
12 compensated for their transportation to the study site at a rate of TZS 8000 (equivalent to US\$ 4) per  
13 person, as agreed upon with MSM representatives and approved by the ethical committee of the  
14 Muhimbili University of Health and Allied Sciences (MUHAS).

### 30 **Patients and public involvement**

31 Not patients were involved in this study

### 32 **Laboratory testing**

33 HIV testing followed the national testing algorithm. All samples were tested using the SD Bioline HIV-  
34 1/2 3.0 rapid test (Standard Diagnostics, Inc., Korea). Non-reactive results were considered negative for  
35 HIV whereas reactive results were subsequently tested with Uni-Gold™ HIV-1/2 (Trinity Biotech Plc,  
36 Ireland). Discrepant results were resolved by Enzygnost HIV Integral II Antibody/Antigen ELISA  
37 (Siemens, Germany).

### 38 **Data analysis**

39 STATA version 15 and the RDSAT statistical package were used for analysis of data emanating from  
40 this survey. Data were weighted to control for network size and the clustering resulting from variations  
41  
42  
43  
44  
45  
46  
47  
48

1  
2  
3 in selection probability and networks sizes [20]. Categorical variables were summarized by calculating  
4  
5 weighted proportions, and differences in proportions were examined using  $\chi^2$  test. Median and inter-  
6  
7 quartile range (IQR) were used to summarize continuous variables. Bivariate analyses and multivariate  
8  
9 logistic regression models were used to measure associations between various risk factors and HIV  
10  
11 infection. All exposure variables with a  $p \leq 0.2$  in bivariate analysis were included into a multivariate  
12  
13 model. Crude and adjusted odds ratios (OR and AOR, respectively) for potential confounders with  
14  
15 corresponding 95% confidence intervals (95%CI) are reported. All analyses were two-tailed and the  
16  
17 significance level was set at 5%.  
18  
19  
20

### 21 **Ethical considerations**

22  
23 The protocol for this survey was reviewed and approved by the ethical review committee of the  
24  
25 Muhimbili University of health and allied sciences (MUHAS). Permission to conduct the study was  
26  
27 thereafter sought from local authorities. All participants provided written informed consent to  
28  
29 participate, separately for interviews and blood sample collection. Participants who tested positive for  
30  
31 HIV were referred to care and treatment for further management.  
32  
33  
34  
35  
36

### 37 **RESULTS**

38  
39 During the study period, 777 eligible MSM consented to participate in the study and gave blood for HIV  
40  
41 testing. Their overall mean age was 26.0 years (standard deviation 7.1) with the largest proportion (34.8%)  
42  
43 being 20-24 years old. A majority had completed either primary (44.8%) or secondary (48.4%) education.  
44  
45 Three quarters (78.9%) reported to never have married, 71.1% were born and raised in Dar es Salaam, and  
46  
47 half (50.6%) lived with their family. The median monthly income was 160,000 Tanzanian shillings (IQR  
48  
49 80,000-300,000), with a third (34.3%) reporting a monthly income above 200,000 shillings (Table 1).  
50  
51  
52  
53  
54  
55  
56  
57

**Table 1: Comparison of HIV prevalence by Socio-demographic Characteristics among MSM in Dar es Salaam, Tanzania (N=777)**

| Variable                    | Category           | n (%)      | HIV Positive n (%) | p-value |
|-----------------------------|--------------------|------------|--------------------|---------|
| Age groups (years)          | 15-19              | 134 (17.3) | 6 (4.45)           | 0.004   |
|                             | 20-24              | 271 (34.8) | 28 (10.3)          |         |
|                             | 25-29              | 152 (19.6) | 24 (15.8)          |         |
|                             | 30-34              | 105 (13.5) | 18 (17.0)          |         |
|                             | ≥ 35               | 115 (14.8) | 20 (17.4)          |         |
| Education level             | No formal          | 21 (2.7)   | 3 (14.3)           | 0.385   |
|                             | Primary            | 348 (44.8) | 43 (12.4)          |         |
|                             | Secondary          | 376 (48.4) | 43 (11.4)          |         |
|                             | Above secondary    | 32 (4.1)   | 7 (21.9)           |         |
| Marital Status              | Never married      | 613 (78.9) | 67 (10.9)          | 0.114   |
|                             | Married/cohabiting | 84 (10.8)  | 14 (16.7)          |         |
|                             | Divorced/separated | 80 (10.3)  | 35 (20.0)          |         |
| Time lived in Dar es Salaam | Born and raised    | 552 (71.1) | 63 (11.4)          | 0.380   |
|                             | Not born           | 225 (28.9) | 33 (14.7)          |         |
| Income past month (TZS)     | <50,000            | 133 (17.1) | 18 (13.5)          | 0.841   |
|                             | 50,000-120,000     | 151 (19.4) | 20 (13.3)          |         |
|                             | 120,001-200,000    | 227 (29.2) | 29 (12.8)          |         |
|                             | >200,000           | 266 (34.3) | 29 (10.9)          |         |
| Currently living with       | Alone              | 304 (39.1) | 39 (12.8)          | 0.219   |
|                             | Family             | 393 (50.6) | 42 (10.7)          |         |
|                             | Boyfriend          | 50 (6.4)   | 11 (22.0)          |         |
|                             | Wife/girlfriend    | 30 (3.9)   | 4 (14.3)           |         |

### Sexual practices and risks

The median age at anal sexual debut was 16 years (IQR: 14-18). Half (51.1%) of the study participants reported to have had sex with a woman. Of those who had had sex with a non-paying male partner in the past month, more than half reported to have had either insertive (57.3%) or receptive (64.3%) sex with 2 or more partners. Use of condoms during last anal sex with a receptive non-paying partner was reported

by 9.3%. Transactional sex was common among the study participants, with one-third (32.6%) reporting to have paid another man for sex during the past month prior to the survey, and nearly three quarters (69.5%) reported to have sold sex in the same period. A total of 80.2% had sold sex during the one-year period preceding the survey. While the proportion of participants who had used condoms with paid partners in the past month was 28.7%, condom use with paying partners in the past month was as high as 80.0%. About 15% of participants reported to have experienced condom breakage while having anal sex during the past month. Just above a quarter (26.2%) said they had engaged in group sex at least once in their lifetime (Table 2).

**Table 2: HIV Prevalence by Selected Sexual Behavior Characteristics among MSM in Dar es Salaam, Tanzania (N=777)**

| Variable                                                   | Category    | N (%)      | HIV Positive n(%) | p-value |
|------------------------------------------------------------|-------------|------------|-------------------|---------|
| Age at first sexual intercourse                            | <15         | 348 (43.4) | 49 (8.3)          | 0.979   |
|                                                            | 16-18       | 266 (33.9) | 29 (8.0)          |         |
|                                                            | >18         | 163 (22.7) | 18 (8.7)          |         |
| Had sex with a woman in past one year                      | Yes         | 377 (51.1) | 29 (5.5)          | 0.023   |
|                                                            | No          | 400 (48.9) | 67 (11.2)         |         |
| Bought sex past one year                                   | Yes         | 320 (37.6) | 41 (9.6)          | 0.376   |
|                                                            | No          | 457 (62.4) | 55 (7.5)          |         |
| Sold sex past one year                                     | Yes         | 644 (80.2) | 84 (9.1)          | 0.108   |
|                                                            | No          | 133 (19.8) | 12 (5.0)          |         |
| Number of non-paying insertive male partners past month    | 1           | 109 (42.7) | 10 (7.9)          | 0.067   |
|                                                            | 2 and above | 184 (57.3) | 19 (10.3)         |         |
| Number of non-paying receptive male partners in past month | 1           | 46 (35.7)  | 12 (29.3)         | 0.489   |
|                                                            | 2 and above | 109 (64.3) | 37 (33.9)         |         |
| Used a condom with last receptive non-paying partner       | Yes         | 73 (9.3)   | 25 (34.2)         | 0.002   |
|                                                            | No          | 450 (90.7) | 54 (12.0)         |         |
| Paid another man for anal sex past month                   | Yes         | 191 (32.6) | 13 (6.9)          | 0.717   |
|                                                            | No          | 586 (67.4) | 30 (5.1)          |         |

| Variable                                         | Category | N (%)      | HIV Positive n(%) | p-value |
|--------------------------------------------------|----------|------------|-------------------|---------|
| Used a condom with last paid male partner        | No       | 554 (71.3) | 75 (13.5)         | 0.059   |
|                                                  | Yes      | 223 (28.7) | 21 (9.4)          |         |
| Sold sex to another man in past month            | Yes      | 540 (69.5) | 54 (10.0)         | 0.771   |
|                                                  | No       | 237 (30.5) | 21 (8.9)          |         |
| Used a condom with last paying male partner      | No       | 108 (20.0) | 8(7.4)            | 0.041   |
|                                                  | Yes      | 432 (80.0) | 60 (13.9)         |         |
| Had a condom break during anal sex in past month | Yes      | 102 (15.1) | 31 (24.1)         | <0.001  |
|                                                  | No       | 395 (84.9) | 49 (7.7)          |         |
| Ever participated in group sex                   | Yes      | 232 (26.2) | 43 (13.0)         | 0.015   |
|                                                  | No       | 545 (73.8) | 53 (6.6)          |         |

### HIV prevalence

The weighted prevalence of HIV was 8.3% (95%CI: 6.3-10.9). The prevalence increased linearly with age and was significantly higher among those who had had sex with a woman in the past year (11.1% versus 5.5%,  $p=0.023$ ), among those who had used a condom with their last non-paying partner (34.2% versus 12.0%,  $p=0.002$ ), among those who had not used a condom with last paying partner (13.9 versus 7.4%,  $p=0.041$ ) and among those reporting condom breakage during last anal sex (24.1% versus 7.7%,  $p<0.0001$ ). Having engaged in group sex was also associated with higher HIV prevalence (13.0% versus 6.6%,  $p=0.015$ ).

### Comparison of HIV prevalence between 2013 and 2017

In 2013, 753 MSM participated in a survey conducted by the same research group that carried out the present study. The mean age in 2013 was 26.5 years (95%CI: 26.1-27.1) while the mean age in 2017 was 26.0 years (95%CI: 25.5-26.5). The age composition of samples therefore did not differ between the two surveys ( $p<0.0001$ ). No significant statistical differences in other socio-demographic characteristics were

observed between the two samples (Table 3). However, the estimated HIV prevalence in 2017 was less than half that of 2013 (8.3% versus 22.3%,  $p < 0.001$ )

**Table 3: Comparison of Socio-Demographic Characteristics of the 2013 and 2017 Survey Samples**

| Demographic Characteristic            | 2013 (%) | 2017 (%) |
|---------------------------------------|----------|----------|
| <b>Age (years)</b>                    |          |          |
| ≤ 24                                  | 46.3     | 52.1     |
| 25-34                                 | 41.2     | 33.1     |
| ≥ 35                                  | 12.4     | 14.8     |
| <b>Level of education</b>             |          |          |
| No formal education                   | 1.1      | 2.7      |
| Some or completed primary education   | 42.9     | 44.8     |
| Some or completed secondary education | 52.9     | 48.4     |
| Post-secondary education              | 3.1      | 4.1      |
| <b>Marital status</b>                 |          |          |
| Single                                | 83.2     | 78.9     |
| Married/cohabiting                    | 5.9      | 10.8     |
| Separated/divorced/widower            | 6.9      | 10.3     |
| <b>Current living arrangement</b>     |          |          |
| With family                           | 52.5     | 50.6     |
| Alone                                 | 35.3     | 39.1     |
| Boyfriend                             | 5.7      | 6.4      |
| Wife/girlfriend                       | 6.0      | 3.9      |
| <b>Occupation</b>                     |          |          |
| Petty trader                          | 39.8     | 39.1     |
| Employed                              | 17.9     | 22.4     |
| Self employed                         | 33.2     | 42.3     |
| Other                                 | 6.5      | 9.3      |

### Independent risk factors for HIV

The results of bivariate and multivariate logistic regression of independent risk factors for HIV infection are presented in Table 4 and 5. HIV prevalence increased with age, with men aged 25 years and above having 4 times higher risk of infection than those who were between 15 and 19 years. Having had 2 or more receptive non-paying male sexual partners in the last month before the survey was associated with higher odds of HIV infection (AOR=3.0; 95%CI: 1.8-12.0). Having used a condom during last sex with a non-paying partner was also associated with increased risk of testing positive for HIV (AOR=4.1; 95%CI:

1.4-7.8) and those who had ever engaged in group sex had 3 times higher odds of being HIV positive (AOR=3.4; 95%CI: 1.7-13.6). On the other hand, condom use during last anal sex with a paying partner (AOR=0.4, 95%CI: 0.2-0.9) was associated with 60% lower odds of HIV infection.

**Table 4: Weighted Logistic Regression Modelling of the Association between Socio-Demographic Factors and HIV among MSM in Dar es Salaam, Tanzania**

| Variable                    | Category           | OR (95%CI)    | AOR (95%CI) <sup>z</sup> | p-value* |
|-----------------------------|--------------------|---------------|--------------------------|----------|
| Age groups (years)          | 15-19              | 1             | 1                        |          |
|                             | 20-24              | 2.3 (0.9;5.4) | 2.3 (0.9;5.6)            | 0.061    |
|                             | 25-29              | 3.5 (1.5;8.4) | 3.9 (1.6;9.5)            | 0.003    |
|                             | 30-34              | 3.8 (1.6;9.3) | 4.1(1.6;10.4)            | 0.003    |
|                             | 35+                | 3.9 (1.6;9.3) | 4.0 (1.4;5.3)            | 0.004    |
| Education level             | No formal          | 1             |                          |          |
|                             | Primary            | 0.9 (0.3;2.5) |                          |          |
|                             | Secondary          | 1.8 (0.3;2.4) |                          |          |
|                             | Above secondary    | 1.5 (0.5;5.3) |                          |          |
| Marital Status              | Never married      | 1             | 1                        |          |
|                             | Married/cohabiting | 0.5(0.9;1.6)  | 1.0 (0.5;2.2)            | 0.990    |
|                             | Divorced/separated | 1.7(1.1;2.9)  | 1.3 (0.7;2.3)            | 0.375    |
| Time lived in Dar es salaam | Born and raised    | 0.4(0.1;1.1)  | 0.4 (0.1;1.3)            | 0.117    |
|                             | 1-5 years          | 0.6(0.2;1.0)  | 0.6 (0.2;1.3)            | 0.386    |
|                             | 6 and above years  | 0.5(0.2;1.6)  | 0.4 (0.1;1.2)            | 0.147    |
| Income past month (TZS)     | <50,000            | 1             |                          |          |
|                             | 50,000-120,000     | 1.0(0.5;1.8)  |                          |          |
|                             | 121,000-200,000    | 0.9(0.6;1.6)  |                          |          |
|                             | >200,000           | 0.8(0.5;1.4)  |                          |          |
| Currently living with       | Alone              | 1             |                          |          |
|                             | Family             | 0.8(0.6;1.5)  |                          |          |
|                             | Boyfriend          | 1.7(0.9;3.1)  |                          |          |
|                             | Wife/girl friend   | 1.1(0.4;2.9)  |                          |          |

<sup>z</sup> Adjusted for all variables in the table with p-value of  $\leq 0.2$  in the bivariate model; \* p-value for adjusted OR

**Table 5: Weighted Logistic Regression Modelling of Association between Sex-Related Risk Factors and HIV among MSM in Dar es Salaam, Tanzania**

| Variable                                                                  | Category    | OR (95%CI)    | AOR (95%CI) <sup>z</sup> | p-value* |
|---------------------------------------------------------------------------|-------------|---------------|--------------------------|----------|
| Age at sexual debut                                                       | ≤ 15        | 1             |                          |          |
|                                                                           | 16-18       | 0.8(0.5;1.2)  |                          |          |
|                                                                           | >18         | 0.8(0.5;1.3)  |                          |          |
| Had sex with a woman past 12 months                                       | No          | 1             | 1.                       | 0.861    |
|                                                                           | Yes         | 0.5(0.3;0.7)  | 0.9(0.6;1.2)             |          |
| Bought sex past one year                                                  | No          | 1             | 1                        | 0.370    |
|                                                                           | Yes         | 1.1(0.7;1.4)  | 1.7(0.6;3.0)             |          |
| Sold sex past one year                                                    | Yes         | 1             |                          |          |
|                                                                           | No          | 0.8(0.2;5.1)  |                          |          |
| Number of male receptive partners where no payment is involved past month | 1           | 1             | 1                        | 0.000    |
|                                                                           | 2 and above | 1.6(1.1;7.5)  | 3.0(1.8;12.0)            |          |
| Number of non-paying insertive male partners past month                   | 1           | 1             | 1                        | 0.531    |
|                                                                           | 2 and above | 1.5(0.5;11.2) | 1.6(0.4;23.1)            |          |
| Used a condom with last receptive non-paying partner                      | No          | 1             | 1                        | 0.000    |
|                                                                           | Yes         | 3.1(1.2;7.2)  | 4.1(1.4;7.8)             |          |
| Paid another man for anal sex past month                                  | No          | 1             | 1                        | 0.142    |
|                                                                           | Yes         | 1.5(0.5;9.2)  | 1.6(0.6;11.8)            |          |
| Used a condom with last paid male partner                                 | Yes         | 1             | 1                        | 0.284    |
|                                                                           | No          | 1.1(0.5;2.1)  | 1.5(0.7;3.0)             |          |
| Used a condom with last paying male partner                               | Yes         | 1             | 1                        | 0.000    |
|                                                                           | No          | 0.6(0.3;1.0)  | 0.4(0.2;0.9)             |          |
| Sold sex to another man past month                                        | No          | 1             | 1                        | 0.156    |
|                                                                           | Yes         | 1.3(0.7;2.2)  | 2.5(0.7;8.5)             |          |
| Had a condom break during anal sex in past month                          | No          | 1             | 1                        | 0.431    |
|                                                                           | Yes         | 1.5(1.7;3.6)  | 1.2(0.7;2.1)             |          |
| Ever participated in group sex                                            | No          | 1             | 1                        | 0.000    |
|                                                                           | Yes         | 3.1(1.2;15.6) | 3.4(1.7;13.6)            |          |

<sup>z</sup> Adjusted for all variables in the table with p-value of ≤0.2 in the bivariate model; \* p-value for adjusted OR



## DISCUSSION

This study examined HIV prevalence among MSM in Dar es Salaam after the national guideline on CHIP had been under implementation in Tanzania since 2014. The estimated HIV prevalence was 8.3% (95%CI: 6.3-10.9), as compared to 22.3% (95%CI: 18.7-26.4) in 2013 [4]. This observation suggests that the HIV prevalence in this population has decreased by 62 percent over the past 5 years. The observed decline is substantial and statistically significant. The socio-demographic characteristics of the 2013 and 2017 survey samples did not differ significantly, suggesting that differences in the study population structure may not explain the observed decline. The difference from 2013 would be even greater if our current estimates were compared to another study conducted among MSM in Dar es Salaam that year. That study (albeit based on a sample of only 200 MSM) reported an HIV prevalence of 30.2% among MSM [6].

The present survey is the first study ever to report declining HIV prevalence among MSM in Tanzania. The decline echoes the dynamic of the overall HIV situation in Tanzania, where HIV prevalence in the general population has been steadily decreasing over the past decade, from 7.0% in 2003 to 4.7% in 2016 [2, 3]. Similar trends of decreasing HIV prevalence in key population groups alongside that in the general population have also been reported elsewhere [7, 9, 22].

Despite the reported decrease, the HIV prevalence among MSM is still twice as high as that among men in the general population in Dar es Salaam. For this reason, recent calls for continued efforts to address HIV in high-risk populations made by the authors of a systematic review of the global epidemiology of HIV among MSM [8] is still very relevant also in Dar es Salaam.

Sexual practices associated with HIV risk continue to be common among MSM in Dar es Salaam, and were significantly associated with HIV seropositivity. A substantial proportion of men have multiple

1  
2  
3 sexual partnerships and engage in group sex, as has also been reported earlier both in Tanzania and  
4  
5 elsewhere in Sub-Saharan Africa [4, 5, 12, 23, 24].  
6

7  
8 Men aged 25 and above had higher HIV prevalence than those who were younger in this study, similar  
9  
10 to what has been reported earlier in Dar es Salaam and elsewhere in Africa [4, 5, 10, 11]. A higher HIV  
11  
12 prevalence among older men may reflect accumulation of risk over time and/or higher survival  
13  
14 following ongoing efforts to improve linkage to care for people testing positive for HIV. The most  
15  
16 recent AIDS indicator survey in Tanzania reported that 90.9% of persons who were between 15 and 64  
17  
18 years of age and who knew their HIV status indicated that they were on antiretroviral treatment, and  
19  
20 87.7% were virally suppressed [2]. However, HIV testing coverage in the country is still low with only  
21  
22 52.2% of people living with HIV knowing their HIV status (in the 15-64 age bracket) [2].  
23  
24

25  
26 More than half of our study participants reported to have had sex with more than 2 partners. Moreover,  
27  
28 transactional sex was very common in this population, with 64% reporting to have paid for sex during  
29  
30 the past month, and 79% reporting to have sold sex during the last month. However, a striking finding  
31  
32 was that condom use was very common among MSM who engaged in commercial sex. Condom use  
33  
34 during last commercial sex was reported by a total of 80% of the study participants as compared to  
35  
36 49% in 2013 [4]. A significant increase in condom use among MSM following preventive education  
37  
38 has recently been reported in a cohort of MSM in West Africa [22]. We found that condom use with  
39  
40 paying partners (commercial sex) was associated with a 60% lower likelihood of HIV infection in this  
41  
42 study. This increase in protected commercial sex may partly explain the decreased HIV prevalence  
43  
44 observed in this study.  
45  
46  
47

48  
49 On the other hand, condom use with regular (non-paying) partners was low in this study (9.3%), but  
50  
51 comparable to that found in other studies of key populations in Tanzania [25]. Low perceived  
52  
53 susceptibility and a sense of trusting a regular partner are factors that have been associated with  
54  
55  
56  
57

1  
2  
3 condom-less sex [26, 27]. Worth noting in this study is the finding that condom use with regular  
4 partners was significantly associated with HIV seropositivity. It is possible that this reflects that some  
5 HIV positive MSM use condoms when they engage in sex to ensure the safety of their partners. This  
6 has also been reported in other studies in Asia and Africa [16, 28, 29].  
7  
8  
9

10  
11 As was the case in our 2014 study among MSM in Dar es Salaam, nearly one-third of the study  
12 participants reported to have engaged in group sex [4], and group sex was associated with HIV  
13 infection. This underscores the need for tailored preventive messaging addressing safer group sex in  
14 implementing the CHIP [2, 17].  
15  
16  
17  
18  
19  
20

## 21 **CONCLUSION**

22  
23 The HIV prevalence among MSM in Dar es Salaam has decreased by more than half over the past 5  
24 years, coinciding with the implementation of the CHIP in Tanzania. Despite of the considerable  
25 decrease, the HIV prevalence in this population still remains twice as high as that among men in general.  
26 More condom protected anal sex could have played a role in the declining HIV prevalence among  
27 MSM. Efforts to promote safer sex among men who engage in multiple sexual partnerships and group  
28 sex are called for. The roll out of new intervention measures, such as pre-exposure prophylaxis, could  
29 significantly contribute in the ongoing efforts to end the epidemic  
30  
31  
32  
33  
34  
35  
36  
37  
38  
39  
40  
41  
42

## 43 **Funding**

44 The work was supported by funding from Danida Fellowship Centre (DFC) through Project No. 16-P03-  
45 TAN and Global Fund to Fight AIDS, Tuberculosis, and Malaria through Tanzania National AIDS  
46 Control Programme.  
47  
48  
49

## 50 **Competing interest statement**

51  
52 Authors declare that they have no competing interest.  
53  
54

## 55 **Authors contributions**

AM analyzed data, interpreted results and drafted the manuscript. EJM designed the study, analyzed data and interpreted results. KM, GHL, TL, NM, AR, MTL, DM and BT designed the study and interpreted the results. SL and MM, collected data and interpreted the results. All authors revised and approved the final version of the manuscript.

### Data availability

Data are available from the corresponding authors upon reasonable request.

### Participants consent

All participants provided written informed consent before interview or blood specimen collection.

### REFERENCES

1. GBD HC: **Estimates of global, regional, and national incidence, prevalence, and mortality of HIV, 1980-2015: the Global Burden of Disease Study 2015.** *Lancet HIV*. 2016 Aug;3(8):. *Lancet HIV* 2016, 3(8):e408.
2. NBS: **Tanzania HIV Impact Survey 2016-2017: Preliminary Findings.** In. Edited by Statistics. NBo. Dar es Salaam: NBS, NACP; 2017.
3. Zanzibar AIDS Commission (ZAC) NBoSN, Office of the Chief Government Statistician (OCGS), ICF International: **Tanzania HIV/AIDS and Malaria Indicator Survey 2011-2012. Dar es salaam, Tanzania:** . In. Dar es Salaam, Tanzania: Zanzibar AIDS Commission (ZAC), National Bureau of Statistics (NBS), Office of the Chief Government Statistician (OCGS), ICF International; 2013.
4. Mmbaga EJ MK, Leyna GH, Mpembeni R, Leshabari MT: **HIV Prevalence and Associated Risk Factors Among Men Who Have Sex With Men in Dar es Salaam, Tanzania.** *J Acquir Immune Defic Syndr* 2018, 77(3):243-249.
5. Mmbaga EJ MK, Makyao N, Mpembeni R, Leshabari MT: **HIV and STI s among men who have sex with men in Dodoma municipality, Tanzania: a cross-sectional study.** *Sex Transm Infect* 2017, 93(5):314-319.
6. Ross MW NJ, Ahaneku HO, Mbwambo J, McClelland RS, McCurdy SA **High HIV seroprevalence, rectal STIs and risky sexual behavior in men who have sex with men in Dar es Salaam and Tanga, Tanzania.** *BMJ Open* 2014, 4(8):e006175.
7. Baral SD GA, Holland C, Papworth E.: **The epidemiology of HIV among men who have sex with men in countries with generalized HIV epidemics.** *Curr Opin HIV AIDS* 2014, 9(2):156-167. .
8. Beyrer C BS, van Griensven F, Goodreau SM, Chariyalertsak S, Wirtz AL, et al.: **Global epidemiology of HIV infection in men who have sex with men.** *Lancet* 2012, 380(9839):367-377.

- 1
- 2
- 3
- 4 9. Djomand G QS, Sullivan PS **HIV epidemic among key populations in west Africa.** *Curr Opin HIV AIDS* 2014, **9**(5):506-513.
- 5
- 6 10. Ferré VM G-KF, Collin G, Dagnra AC, Le Hingrat Q, Jaquet A, Salou M, Descamps D, Charpentier C, Ekouevi DK.: **Prevalence of Human Papillomavirus, HIV and other sexually transmitted infections among men having sex with men in Togo: a national cross-sectional survey.** *Clin Infect Dis* 2019, **6**( doi: 10.1093/cid/ciy1012.).
- 7
- 8
- 9
- 10 11. Hladik W BJ, Ssenkusu JM, Opio A, Tappero JW, Hakim A, et al. : **HIV Infection among Men Who Have Sex with Men in Kampala, Uganda—A Respondent Driven Sampling Survey.** *PLoS One* 2012, **7**(5).
- 11
- 12
- 13 12. Ouedraogo HG K-ZO, Grosso A, Goodman S, Samadoulougou BC, Tarnagda G, Baguiya A, Tiendrebeogo S, Lougue M, Sawadogo N, Traore Y, Barro N, Baral S, Kouanda S. : **Human immunodeficiency virus (HIV) among men who have sex with men: results of the first integrated biological and behavioral survey in Burkina Faso, West Africa.** . *BMC Public Health* 2019, **19**(1):5. doi: 10.1186/s12889-12018-16361-12881.
- 14
- 15
- 16 13. Dahoma M JL, Holman A: **HIV and related risk behavior among men who have sex with men in Zanzibar, Tanzania: results of a behavioral surveillance survey.** *AIDS Behav* 2011, **15**:186-196.
- 17
- 18
- 19 14. Baral S SF, Cleghorn F, Beyrer C.: **Elevated risk for HIV infection among men who have sex with men in low- and middle-income countries 2000-2006: a systematic review.** *PLoS Med* 2007, **4**(12):e339.
- 20
- 21
- 22 15. Dahoma MJ SA, Abdool R: **HIV and substance abuse: the dual epidemics challenging Zanzibar.** *African Journal of Drugs and Alcohol Studies* 2006, **5**:129–138.
- 23
- 24 16. Merrigan M AA, Afolabi B, Chabikuli ON, Onyekwena O, Eluwa G, et al.: **HIV prevalence and risk behaviours among men having sex with men in Nigeria.** *Sex Transm Infect* 2011, **87**(1):65–70.
- 25
- 26 17. UNAIDS: **90–90–90—an ambitious treatment target to help end the AIDS epidemic.** . In: <http://www.unaids.org/en/resources/documents/2014/90-90-90> (accessed September 10, 2019). Geneva, Switzerland: UNAIDS; 2014.
- 27
- 28 18. Programme NAC: **Comprehensive Guideline for HIV prevention among Key Population in Tanzania.** . In. Dar es Salaam, Tanzania: NACP; 2016.
- 29
- 30 19. Mmbaga EJ LG, Mpembeni R, Moen K, Makyao N, Leshabari M: **Intergrated Biobehavioral Survey among men who have sex with men in dar es salaam, Tanzania.** In. Dar es Salaam, Tanzania: National AIDS Control Program, MUHAS; 2014.
- 31
- 32 20. DD. H: **Respondent-Driven Sampling II: Deriving Valid Population Estimates from Chain-Referral Samples of Hidden Populations.** *Soc Probl* 2002, **49**(1):11–34.
- 33
- 34 21. DD H: **Snowball versus respondent-driven sampling.** *Sociol Methodol* 2011, **41**(1):355-366.
- 35
- 36 22. Coulaud PJ S-TL, Mimi M, Maradan G et al.: **Changes in risky sexual behaviours among West African MSM enrolled in a quarterly HIV testing and counselling prevention programme.** *Sex Transm Infect* 2019, **2019 Aug 1**. pii: **sextrans-2018-053892.** .
- 37
- 38 23. Mgbako O PS, Callander D, Brinker D, Kuhner C, Carrico A: **Transactional sex, condomless anal sex, and HIV risk among men who have sex with men.** *Int J STD & AIDS* 2019, **30**(8):795–801.
- 39
- 40 24. Coulaud PJ S-TL, m Mimi M, M'madi Mrenda B, Maradan G et al. : **Combined Sexual Behavioral Profiles in HIV-Seronegative Men Who have Sex with Men in West Africa** *Arch Sex Behav* 2019, **2019 Aug 9**. doi: **10.1007/s10508-019-01513-z.** .
- 41
- 42
- 43
- 44
- 45
- 46
- 47
- 48
- 49
- 50
- 51
- 52
- 53
- 54
- 55
- 56
- 57
- 58
- 59
- 60

- 1  
2  
3 25. Mbita G MA, Plotkin M, Casalini C, Shao A, Lija G, Boyee D, Ramadhan A, Makyayo N,  
4 Mlange R, Bandio R, Christofeld M, Komba A.: **Consistent Condom Use and Dual Protection**  
5 **Among Female Sex Workers: Surveillance Findings from a Large-Scale, Community-**  
6 **Based Combination HIV Prevention Program in Tanzania** *AIDS Behav* 2019, **2019 Aug 23.**  
7 **doi: 10.1007/s10461-019-02642-1.**  
8  
9 26. Manjengwa PG MK, Musekiwa A, Kuonza LR. : **Cognitive and behavioural determinants of**  
10 **multiple sexual partnerships and condom use in South Africa: Results of a national survey.**  
11 *South Afr J HIV Med* 2019, **20(1):868.** doi: 810.4102/sajhivmed.v4120i4101.4868. .  
12  
13 27. Giano Z KK, Durham AR, Currin JM, Wheeler DL, Croff JM, Hubach RD.: **Factors Associated**  
14 **with Condom Use among a Sample of Men Who Have Sex with Men (MSM) Residing in**  
15 **Rural Oklahoma.** *J Homosex* 2019, **May 24:1-21.** doi: 10.1080/00918369.2019.1616430. .  
16  
17 28. Deuba K KV, Koirala S for the CAT-S group, et al: **Condom use behaviour among people**  
18 **living with HIV: a seven-country community-based participatory research in the Asia-**  
19 **Pacific region.** *Sex Transm Infect* 2018, **94:200-205.** .  
20  
21 29. Tobin-West CI NS, Maduka O, Oranu E, Onyekwere VN, Tamuno I. : **Exploring the HIV-risk**  
22 **practices of men who have sex with men in Port Harcourt city, Nigeria.** *Ann Trop Med*  
23 *Public Health* 2017, **10(3):551.**  
24  
25  
26  
27  
28  
29  
30  
31  
32  
33  
34  
35  
36  
37  
38  
39  
40  
41  
42  
43  
44  
45  
46  
47  
48  
49  
50  
51  
52  
53  
54  
55  
56  
57  
58  
59  
60

STROBE Statement—Checklist of items that should be included in reports of *cross-sectional studies*

|                              | Item No | Recommendation                                                                                                                                                                                               | Page No |
|------------------------------|---------|--------------------------------------------------------------------------------------------------------------------------------------------------------------------------------------------------------------|---------|
| <b>Title and abstract</b>    | 1       | (a) Indicate the study's design with a commonly used term in the title or the abstract                                                                                                                       | 01      |
|                              |         | (b) Provide in the abstract an informative and balanced summary of what was done and what was found                                                                                                          | 02      |
| <b>Introduction</b>          |         |                                                                                                                                                                                                              |         |
| Background/rationale         | 2       | Explain the scientific background and rationale for the investigation being reported                                                                                                                         | 03      |
| Objectives                   | 3       | State specific objectives, including any prespecified hypotheses                                                                                                                                             | 04      |
| <b>Methods</b>               |         |                                                                                                                                                                                                              |         |
| Study design                 | 4       | Present key elements of study design early in the paper                                                                                                                                                      | 04      |
| Setting                      | 5       | Describe the setting, locations, and relevant dates, including periods of recruitment, exposure, follow-up, and data collection                                                                              | 04      |
| Participants                 | 6       | (a) Give the eligibility criteria, and the sources and methods of selection of participants                                                                                                                  | 05      |
| Variables                    | 7       | Clearly define all outcomes, exposures, predictors, potential confounders, and effect modifiers. Give diagnostic criteria, if applicable                                                                     | 6-7     |
| Data sources/<br>measurement | 8*      | For each variable of interest, give sources of data and details of methods of assessment (measurement). Describe comparability of assessment methods if there is more than one group                         | 5-7     |
| Bias                         | 9       | Describe any efforts to address potential sources of bias                                                                                                                                                    | 5-7     |
| Study size                   | 10      | Explain how the study size was arrived at                                                                                                                                                                    | 05      |
| Quantitative variables       | 11      | Explain how quantitative variables were handled in the analyses. If applicable, describe which groupings were chosen and why                                                                                 | 6-7     |
| Statistical methods          | 12      | (a) Describe all statistical methods, including those used to control for confounding                                                                                                                        | 6-7     |
|                              |         | (b) Describe any methods used to examine subgroups and interactions                                                                                                                                          | 6-7     |
|                              |         | (c) Explain how missing data were addressed                                                                                                                                                                  | -       |
|                              |         | (d) If applicable, describe analytical methods taking account of sampling strategy                                                                                                                           | 6-7     |
|                              |         | (e) Describe any sensitivity analyses                                                                                                                                                                        | 6-7     |
| <b>Results</b>               |         |                                                                                                                                                                                                              |         |
| Participants                 | 13*     | (a) Report numbers of individuals at each stage of study—eg numbers potentially eligible, examined for eligibility, confirmed eligible, included in the study, completing follow-up, and analysed            | 7       |
|                              |         | (b) Give reasons for non-participation at each stage                                                                                                                                                         | 7-8     |
|                              |         | (c) Consider use of a flow diagram                                                                                                                                                                           | -       |
| Descriptive data             | 14*     | (a) Give characteristics of study participants (eg demographic, clinical, social) and information on exposures and potential confounders                                                                     | 8       |
|                              |         | (b) Indicate number of participants with missing data for each variable of interest                                                                                                                          | 8       |
| Outcome data                 | 15*     | Report numbers of outcome events or summary measures                                                                                                                                                         | 9       |
| Main results                 | 16      | (a) Give unadjusted estimates and, if applicable, confounder-adjusted estimates and their precision (eg, 95% confidence interval). Make clear which confounders were adjusted for and why they were included | 12      |

|                          |    |                                                                                                                                                                            |       |
|--------------------------|----|----------------------------------------------------------------------------------------------------------------------------------------------------------------------------|-------|
|                          |    | (b) Report category boundaries when continuous variables were categorized                                                                                                  | 12-13 |
|                          |    | (c) If relevant, consider translating estimates of relative risk into absolute risk for a meaningful time period                                                           | 12-13 |
| Other analyses           | 17 | Report other analyses done—eg analyses of subgroups and interactions, and sensitivity analyses                                                                             | 12-13 |
| <b>Discussion</b>        |    |                                                                                                                                                                            |       |
| Key results              | 18 | Summarise key results with reference to study objectives                                                                                                                   | 14    |
| Limitations              | 19 | Discuss limitations of the study, taking into account sources of potential bias or imprecision. Discuss both direction and magnitude of any potential bias                 | 03    |
| Interpretation           | 20 | Give a cautious overall interpretation of results considering objectives, limitations, multiplicity of analyses, results from similar studies, and other relevant evidence | 16    |
| Generalisability         | 21 | Discuss the generalisability (external validity) of the study results                                                                                                      | 16    |
| <b>Other information</b> |    |                                                                                                                                                                            |       |
| Funding                  | 22 | Give the source of funding and the role of the funders for the present study and, if applicable, for the original study on which the present article is based              | 16    |

\*Give information separately for exposed and unexposed groups.

**Note:** An Explanation and Elaboration article discusses each checklist item and gives methodological background and published examples of transparent reporting. The STROBE checklist is best used in conjunction with this article (freely available on the Web sites of PLoS Medicine at <http://www.plosmedicine.org/>, Annals of Internal Medicine at <http://www.annals.org/>, and Epidemiology at <http://www.epidem.com/>). Information on the STROBE Initiative is available at [www.strobe-statement.org](http://www.strobe-statement.org).



# BMJ Open

## HIV Prevalence among Men Who Have Sex with Men following the Implementation of the HIV Preventive Guideline in Tanzania: Respondent Driven Sampling Survey

|                                 |                                                                                                                                                                                                                                                                                                                                                                                                                                                                                                                                                                                                                                                                                                                                                                                                                                                                                                                                                                                                                                                                     |
|---------------------------------|---------------------------------------------------------------------------------------------------------------------------------------------------------------------------------------------------------------------------------------------------------------------------------------------------------------------------------------------------------------------------------------------------------------------------------------------------------------------------------------------------------------------------------------------------------------------------------------------------------------------------------------------------------------------------------------------------------------------------------------------------------------------------------------------------------------------------------------------------------------------------------------------------------------------------------------------------------------------------------------------------------------------------------------------------------------------|
| Journal:                        | <i>BMJ Open</i>                                                                                                                                                                                                                                                                                                                                                                                                                                                                                                                                                                                                                                                                                                                                                                                                                                                                                                                                                                                                                                                     |
| Manuscript ID                   | bmjopen-2019-036460.R1                                                                                                                                                                                                                                                                                                                                                                                                                                                                                                                                                                                                                                                                                                                                                                                                                                                                                                                                                                                                                                              |
| Article Type:                   | Original research                                                                                                                                                                                                                                                                                                                                                                                                                                                                                                                                                                                                                                                                                                                                                                                                                                                                                                                                                                                                                                                   |
| Date Submitted by the Author:   | 17-Jun-2020                                                                                                                                                                                                                                                                                                                                                                                                                                                                                                                                                                                                                                                                                                                                                                                                                                                                                                                                                                                                                                                         |
| Complete List of Authors:       | Alexander Ishungisa, Mwijage; Muhimbili University of Health and Allied Sciences, Behavioral Sciences; Muhimbili University of Health and Allied Sciences, Medical Botany, Plant Breeding and Agronomy<br>Moen, Kare; University of Oslo<br>Leyna, Germana; Muhimbili University of Health and Allied Sciences, Public Health and Social Sciences<br>Makyao, Neema; Tanzania National AIDS control Program<br>Ramadhan, Angela; Kilimanjaro Christian Medical University College<br>Lange, Theis; University of Copenhagen, Section of Biostatistics<br>Meyrowitsch, Dan; University of Copenhagen, Global Health Section<br>Mizinduko, Mucho; Muhimbili University of Health and Allied Sciences, Epidemiology<br>Likindikoki, Samuel; Muhimbili University of Health and Allied Sciences<br>Thomas Leshabar, Melkzedek ; Muhimbili University College of Health Sciences, Behavioral Sciences<br>Mmbaga, Elia John; Muhimbili Univ Hlth , Epidemiology and Biostatistics; Universitetet i Oslo Avdeling for samfunnsmedisin, Community Medicine and Global Health |
| <b>Primary Subject Heading</b>: | HIV/AIDS                                                                                                                                                                                                                                                                                                                                                                                                                                                                                                                                                                                                                                                                                                                                                                                                                                                                                                                                                                                                                                                            |
| Secondary Subject Heading:      | Epidemiology, Public health, Sexual health                                                                                                                                                                                                                                                                                                                                                                                                                                                                                                                                                                                                                                                                                                                                                                                                                                                                                                                                                                                                                          |
| Keywords:                       | HIV & AIDS < INFECTIOUS DISEASES, Infection control < INFECTIOUS DISEASES, Public health < INFECTIOUS DISEASES, EPIDEMIOLOGY                                                                                                                                                                                                                                                                                                                                                                                                                                                                                                                                                                                                                                                                                                                                                                                                                                                                                                                                        |
|                                 |                                                                                                                                                                                                                                                                                                                                                                                                                                                                                                                                                                                                                                                                                                                                                                                                                                                                                                                                                                                                                                                                     |

SCHOLARONE™  
Manuscripts



I, the Submitting Author has the right to grant and does grant on behalf of all authors of the Work (as defined in the below author licence), an exclusive licence and/or a non-exclusive licence for contributions from authors who are: i) UK Crown employees; ii) where BMJ has agreed a CC-BY licence shall apply, and/or iii) in accordance with the terms applicable for US Federal Government officers or employees acting as part of their official duties; on a worldwide, perpetual, irrevocable, royalty-free basis to BMJ Publishing Group Ltd ("BMJ") its licensees and where the relevant Journal is co-owned by BMJ to the co-owners of the Journal, to publish the Work in this journal and any other BMJ products and to exploit all rights, as set out in our [licence](#).

The Submitting Author accepts and understands that any supply made under these terms is made by BMJ to the Submitting Author unless you are acting as an employee on behalf of your employer or a postgraduate student of an affiliated institution which is paying any applicable article publishing charge ("APC") for Open Access articles. Where the Submitting Author wishes to make the Work available on an Open Access basis (and intends to pay the relevant APC), the terms of reuse of such Open Access shall be governed by a Creative Commons licence – details of these licences and which [Creative Commons](#) licence will apply to this Work are set out in our licence referred to above.

Other than as permitted in any relevant BMJ Author's Self Archiving Policies, I confirm this Work has not been accepted for publication elsewhere, is not being considered for publication elsewhere and does not duplicate material already published. I confirm all authors consent to publication of this Work and authorise the granting of this licence.

# HIV Prevalence among Men Who Have Sex with Men following the Implementation of the HIV Preventive Guideline in Tanzania: Respondent Driven Sampling Survey

Alexander Mwijage<sup>1</sup>, Kåre Moen<sup>2</sup>, Germana Henry Leyna<sup>3,4</sup>, Neema Makyao<sup>5</sup>, Angela Ramadhan<sup>5</sup>, Theis Lange<sup>6</sup>, Dan Wolf Meyrowitsch<sup>6</sup>, Mucho Mizinduko<sup>3</sup>, Samuel Likindikoki<sup>3</sup>, Melkzedek Thomas Leshabari<sup>1</sup>, Elia John Mmbaga<sup>2,3</sup>

<sup>1</sup>*Department of Behavioral Sciences, Muhimbili University of Health and Allied Sciences, Dar es Salaam, Tanzania,*

<sup>2</sup>*Department of Community Medicine and Global Health, Institute of Health and Society, University of Oslo, Norway,*

<sup>3</sup>*Department of Epidemiology and Biostatistics, Muhimbili University of Health and Allied Sciences, Dar es Salaam, Tanzania,*

<sup>4</sup>*Tanzania Food and Nutrition Centre, Dar es Salaam, Tanzania*

<sup>5</sup>*Ministry of Health Community Development, Gender, Elderly and Children, Dodoma, Tanzania, and*

<sup>6</sup>*Department of Public Health, University of Copenhagen, Copenhagen, Denmark*

## **Corresponding author's address:**

Muhimbili University of Health and Allied Sciences,

9 United Nations Road,

P.O BOX 56001, Dar es Salaam, Tanzania

Email: [mwijagealexander2014@yahoo.com](mailto:mwijagealexander2014@yahoo.com)

Phone: +255752194077

## ABSTRACT

**Objectives:** To estimate HIV prevalence and associated risk factors among men who have sex with men (MSM) in Dar es Salaam, Tanzania following nearly half a decade of implementation of the comprehensive package for HIV interventions for key populations (CHIP).

**Design:** A cross-sectional survey using respondent-driven sampling

**Setting:** Dar es Salaam, Tanzania's largest city.

**Participants:** Men who occasionally or regularly have sex with another man (men who self-reported to have ever had sex with other men in the past three months preceding the study), aged 18 years and above and living in Dar es Salaam city at least six months preceding the study.

**Primary outcome measure:** HIV prevalence was the primary outcome. Independent risk factors for HIV infection were examined using weighted logistics regression modelling.

**Results:** A total of 777 MSM with a mean age of 26 years took part in the study. The weighted HIV prevalence was 8.3% (95%CI: 6.3-10.9) as compared to 22.3% (95%CI: 18.7-26.4) observed in a similar survey in 2014. Half of the participants had had sex with more than 2 partners in the month preceding the survey. Among those who had engaged in transactional sex, 80% had used a condom during last anal sex with a paying partner. Participants aged 25 and above had 4 times higher odds of being infected than those aged 15-19. HIV infection was associated with multiple sexual partnerships (AOR, 3.0; 95%CI: 1.8-12.0), not having used condom during last sex with non-paying partner (AOR, 4.1; 95%CI: 1.4-7.8), and ever having engaged in group sex (AOR, 3.4; 95%CI: 1.7-13.6).

**Conclusion:** HIV prevalence among MSM in Dar es Salaam has decreased by more than half over the past 5 years, coinciding with implementation of the CHIP. It is nonetheless twice as high as that of men in the general population. To achieve the 2030 goal, behavioral change interventions and roll-out of new intervention measures such as pre-exposure prophylaxis are urgently needed.

**Keywords:** Men who have sex with men; HIV prevalence; risk behaviors; comprehensive intervention package; Tanzania

### Strengths and limitations of this study

- This is the largest respondent driven sampling survey among MSM in Tanzania and study participants were recruited from diverse strata of the population.
- The results were weighted to control for network size and clustering resulting from variations in selection probability and network sizes in respondent driven sampling
- Comparisons are made with HIV prevalence estimates generated in a methodologically comparable survey conducted before the launch of the comprehensive package for HIV prevention and care for key population.
- Data on sexual behavior is subject to social desirability bias.
- Data on sexual behavior is subject to social desirability bias and this study did not measure biological risk factors for HIV infection which might have provided more insight into the risk profile of this population.

## Background

Since 2004, the rate of HIV infection has been declining globally including in Tanzania [1]. The Tanzania HIV Indicator and Impact Surveys indicate that the HIV prevalence among persons aged 15-49 decreased from 7% in 2004 to 4.7% in 2016 [2, 3]. The observed decrease has been attributed to concerted efforts to promote condom use and to an improved HIV testing coverage with 90.9% linkage to antiretroviral therapy (ART) among those who test positive for HIV and 87.7% viral suppression [2].

While evidence of declining overall HIV infection rates has been mounting, populations at higher risk of HIV infection, such as MSM, have continued to carry a disproportionate burden of HIV in Africa and beyond. Studies from Africa have indicated that the HIV prevalence among MSM are 2 to 20 times higher than that in the general population [4-12]. Recent studies have estimated the HIV prevalence among MSM in Tanzania to range from 12.5% in Zanzibar to 22.3% in Dar es Salaam and 11.1% in Tanga [4, 6, 13]. Practices associated with increased risk of HIV, such as multiple sexual partnerships, unprotected anal sex, group sex, alcohol and drug use, and commercial sex have been commonly reported among MSM [4, 9, 13-16]. A high prevalence of sexually transmitted infections, such as herpes simplex virus type 2, has also been associated with high infection rates among MSM [4, 6, 10, 12, 14].

Populations at increased risk of HIV infection have been estimated to contribute up to 30% of new HIV infections in sub-Saharan Africa, making it impossible to leave them behind if we are to achieve the ambitious third sustainable development goal and end the HIV epidemic by 2030 [7, 17].

In 2014, Tanzania launched a comprehensive package for HIV prevention and care among key population (CHIP) coupled with training of healthcare workers and the embracement of a multi-sectorial approach to

1  
2  
3 control the HIV epidemic [18]. CHIP provided a detailed description of preventive, curative and  
4 psychosocial interventions key population including MSM should receive when seeking healthcare  
5 services. Nearly half a decade later, no study has evaluated the state of the HIV epidemic in key  
6 populations. Given the notable decrease in HIV infection rates in Tanzania's general population, it is  
7 important that the dynamic of the HIV epidemic is tracked also in these populations as to inform  
8 government efforts aiming to achieve the 2030 goal [2]. This study seeks to provide information on the  
9 prevalence of HIV and associated sexual behavior-related risk factors among MSM in Dar es Salaam  
10 following nearly half a decade of implementation of CHIP.  
11  
12  
13  
14  
15  
16  
17  
18  
19  
20  
21  
22

## 23 **METHODS**

### 24 **Design and setting**

25  
26 This was a cross sectional integrated bio-behavioral surveillance (IBBS) survey among MSM conducted  
27 between October and December 2017 in Dar es Salaam, the largest city in Tanzania. The location was  
28 chosen because it has a large population of MSM and a high prevalence of HIV, and also because baseline  
29 data were available for comparison (i.e., data on HIV prevalence and associated risk factors among MSM  
30 before the implementation of the CHIP started [19]). Dar es Salaam is a fast-growing city and currently  
31 has a population of about 5 million. The estimated overall HIV prevalence among adults aged 15-49 is  
32 6.3% [2].  
33  
34  
35  
36  
37  
38  
39  
40  
41  
42  
43

### 44 **Study population**

45  
46 MSM aged 18 and above were invited to participate in this survey. Participation required that the person  
47 had engaged in same-sex sex during the last 3 months preceding the survey. Also, participants needed to  
48 have had an address in, and lived in, Dar es Salaam for at least six months before recruitment commenced.  
49  
50  
51  
52

### 53 **Sample size estimation**

1  
2  
3 We used the formula by Fleiss et al to calculate the sample size which aimed at achieving desired precision  
4 around point estimates for HIV infection among MSM [3]. According to the 2014 estimates for Dar es  
5 Salaam, the prevalence of HIV was 22% among MSM [4]. With a desired precision of 5%, taking into  
6 account a design effect (DEFF) of 3, based on the median DEFF found for key variables in similar RDS  
7 surveys in the region [5-9], the estimated sample size for this study was 759.  
8  
9

### 14 **Sampling and recruitment**

15  
16 Since there was no sampling frame for MSM, eligible study participants were recruited using respondent-  
17 driven sampling (RDS) [20]. RDS is a chain referral sampling method that incorporates a recruitment  
18 strategy to offset oversampling of certain population groups to minimize traditional snowballing bias [21].  
19 Initially, selected members of the target population (referred to as “seeds”) refer other members of the  
20 same population to the study team for possible participation in a succession of waves until the desired  
21 sample size is achieved. Seeds were identified from different strata of MSM among our previous study  
22 contacts and through a meeting with the key population community advisory board. Characteristics that  
23 were taken into account in selection of seeds were age, socio-economic status, locality and sexual  
24 preference (preference for insertive or receptive anal sex). Recruitment networks by age groups for this  
25 study are presented in figure 1.  
26  
27  
28  
29  
30  
31  
32  
33  
34  
35  
36  
37  
38  
39  
40  
41

### 42 **Data collection tool and data collection procedures**

43  
44 A questionnaire validated in previous IBBS surveys conducted by our research group and others was used  
45 in this study [4]. The questionnaire contained questions on socio-demographic characteristics and sexual  
46 practices and was administered in Swahili, the language spoken by all Tanzanians. Seeds were identified  
47 and represented different groups of MSM. Participants were invited to a recruitment centre where they  
48 were provided with information about the study and asked if they would consent to participate in it. All  
49  
50  
51  
52  
53  
54  
55  
56  
57  
58  
59  
60



1  
2  
3 study participants gave informed consent to take part in the research, and face-to-face interviews using  
4  
5 Android tablets equipped with an Open Data Kit (ODK) for recording of data. Following the interviews,  
6  
7 HIV pre-test counseling was carried out before participants were offered to test for HIV. All participants  
8  
9 received health education and condoms after the interview and were compensated for their transportation  
10  
11 to the study site at a rate of TZS 8000 (equivalent to US\$ 4) per person, as agreed upon with MSM  
12  
13 representatives and approved by the ethical committee of the Muhimbili University of Health and Allied  
14  
15 Sciences (MUHAS).  
16  
17

### 18 19 **Patients and public involvement**

20  
21 Not patients were involved in this study  
22  
23

### 24 25 **Laboratory testing**

26  
27 HIV testing followed the national testing algorithm. All samples were tested using the SD Bioline HIV-  
28  
29 1/2 3.0 rapid test (Standard Diagnostics, Inc., Korea). Non-reactive results were considered negative for  
30  
31 HIV whereas reactive results were subsequently tested with Uni-Gold™ HIV-1/2 (Trinity Biotech Plc,  
32  
33 Ireland). Discrepant results were resolved by Enzygnost HIV Integral II Antibody/Antigen ELISA  
34  
35 (Siemens, Germany).  
36  
37

### 38 39 **Data analysis**

40  
41 STATA version 15 and the RDSAT statistical package were used for analysis of data emanating from this  
42  
43 survey. Data were weighted to control for network size and the clustering resulting from variations in  
44  
45 selection probability and networks sizes [20]. Categorical variables were summarized by calculating  
46  
47 weighted proportions, and differences in proportions were examined using  $\chi^2$  test. Median and inter-  
48  
49 quartile range (IQR) were used to summarize continuous variables. Bivariate analyses and multivariate  
50  
51 logistic regression models were used to measure associations between various risk factors and HIV  
52  
53 infection. All exposure variables with a  $p \leq 0.2$  in bivariate analysis were included into a multivariate  
54  
55  
56  
57  
58  
59  
60

1  
2  
3 model. Crude and adjusted odds ratios (OR and AOR, respectively) for potential confounders with  
4 corresponding 95% confidence intervals (95%CI) are reported. All analyses were two-tailed and the  
5  
6  
7 significance level was set at 5%.  
8  
9

### 10 **Ethical considerations**

11  
12 The protocol for this survey was reviewed and approved by the ethical review committee of the Muhimbili  
13 University of health and allied sciences (MUHAS). Permission to conduct the study was thereafter sought  
14 from local authorities. All participants provided written informed consent to participate, separately for  
15 interviews and blood sample collection. Participants who tested positive for HIV were referred to care and  
16  
17  
18  
19  
20  
21  
22  
23  
24  
25  
26  
27  
28  
29  
30  
31  
32  
33  
34  
35  
36  
37  
38  
39  
40  
41  
42  
43  
44  
45  
46  
47  
48  
49  
50  
51  
52  
53  
54  
55  
56  
57  
58  
59  
60  
treatment for further management.

### 26 **RESULTS**

28 During the study period, 777 eligible MSM consented to participate in the study and gave blood for HIV  
29 testing. Their overall mean age was 26.0 years (standard deviation  $\pm$  7.1) with the largest proportion  
30  
31  
32  
33  
34  
35  
36  
37  
38  
39  
40  
41  
42  
43  
44  
45  
46  
47  
48  
49  
50  
51  
52  
53  
54  
55  
56  
57  
58  
59  
60  
(34.8%) being 20-24 years old. A majority had completed either primary (44.8%) or secondary (48.4%)  
education. Three quarters (78.9%) reported to have never married, 71.1% were born and raised in Dar es  
Salaam, and half (50.6%) lived with their family. The median monthly income was 160,000 Tanzanian  
shillings (IQR 80,000-300,000), with a third (34.3%) reporting a monthly income above 200,000 shillings  
(Table 1).

**Table 1: Comparison of HIV prevalence by Socio-demographic Characteristics among MSM in Dar es Salaam,****Tanzania (N=777)**

| Variable                    | Category           | n (%)      | HIV Positive n (%) | p-value |
|-----------------------------|--------------------|------------|--------------------|---------|
| Age groups (years)          | 15-19              | 134 (17.3) | 6 (4.45)           | 0.004   |
|                             | 20-24              | 271 (34.8) | 28 (10.3)          |         |
|                             | 25-29              | 152 (19.6) | 24 (15.8)          |         |
|                             | 30-34              | 105 (13.5) | 18 (17.0)          |         |
|                             | ≥ 35               | 115 (14.8) | 20 (17.4)          |         |
| Education level             | No formal          | 21 (2.7)   | 3 (14.3)           | 0.385   |
|                             | Primary            | 348 (44.8) | 43 (12.4)          |         |
|                             | Secondary          | 376 (48.4) | 43 (11.4)          |         |
|                             | Above secondary    | 32 (4.1)   | 7 (21.9)           |         |
| Marital Status              | Never married      | 613 (78.9) | 67 (10.9)          | 0.114   |
|                             | Married/cohabiting | 84 (10.8)  | 14 (16.7)          |         |
|                             | Divorced/separated | 80 (10.3)  | 35 (20.0)          |         |
| Time lived in Dar es Salaam | Born and raised    | 552 (71.1) | 63 (11.4)          | 0.380   |
|                             | Not born           | 225 (28.9) | 33 (14.7)          |         |
| Income past month (TZS)     | <50,000            | 133 (17.1) | 18 (13.5)          | 0.841   |
|                             | 50,000-120,000     | 151 (19.4) | 20 (13.3)          |         |
|                             | 120,001-200,000    | 227 (29.2) | 29 (12.8)          |         |
|                             | >200,000           | 266 (34.3) | 29 (10.9)          |         |
| Currently living with       | Alone              | 304 (39.1) | 39 (12.8)          | 0.219   |
|                             | Family             | 393 (50.6) | 42 (10.7)          |         |
|                             | Boyfriend          | 50 (6.4)   | 11 (22.0)          |         |
|                             | Wife/girlfriend    | 30 (3.9)   | 4 (14.3)           |         |

**Sexual practices and risks**

The median age at anal sexual debut was 16 years (IQR: 14-18). Half (51.1%) of the study participants reported to have had sex with a woman. Of those who had had sex with a non-paying male partner in the past month, more than half reported to have had either insertive (57.3%) or receptive (64.3%) sex with 2 or more partners. Use of condoms during last anal sex with a receptive non-paying partner was reported

by 9.3%. Transactional sex was common among the study participants, with one-third (32.6%) reporting to have paid another man for sex during the past month prior to the survey, and nearly three quarters (69.5%) reported to have sold sex in the same period. A total of 80.2% had sold sex during the one-year period preceding the survey. While the proportion of participants who had used condoms with paid partners in the past month was 28.7%, condom use with paying partners in the past month was as high as 80.0%. About 15% of participants reported to have experienced condom breakage while having anal sex during the past month. Just above a quarter (26.2%) said they had engaged in group sex at least once in their lifetime (Table 2).

**Table 2: HIV Prevalence by Selected Sexual Behavior Characteristics among MSM in Dar es Salaam, Tanzania (N=777)**

| Variable                                                   | Category    | N (%)      | HIV n(%)  | Positive | p-value |
|------------------------------------------------------------|-------------|------------|-----------|----------|---------|
| Age at first sexual intercourse                            | <15         | 348 (43.4) | 49 (8.3)  |          | 0.979   |
|                                                            | 16-18       | 266 (33.9) | 29 (8.0)  |          |         |
|                                                            | >18         | 163 (22.7) | 18 (8.7)  |          |         |
| Had sex with a woman in past one year                      | Yes         | 377 (51.1) | 29 (5.5)  |          | 0.023   |
|                                                            | No          | 400 (48.9) | 67 (11.2) |          |         |
| Bought sex past one year                                   | Yes         | 320 (37.6) | 41 (9.6)  |          | 0.376   |
|                                                            | No          | 457 (62.4) | 55 (7.5)  |          |         |
| Sold sex past one year                                     | Yes         | 644 (80.2) | 84 (9.1)  |          | 0.108   |
|                                                            | No          | 133 (19.8) | 12 (5.0)  |          |         |
| Number of non-paying insertive male partners past month    | 1           | 109 (42.7) | 10 (7.9)  |          | 0.067   |
|                                                            | 2 and above | 184 (57.3) | 19 (10.3) |          |         |
| Number of non-paying receptive male partners in past month | 1           | 46 (35.7)  | 12 (29.3) |          | 0.489   |
|                                                            | 2 and above | 109 (64.3) | 37 (33.9) |          |         |
| Used a condom with last receptive non-paying partner       | Yes         | 73 (9.3)   | 25 (34.2) |          | 0.002   |
|                                                            | No          | 450 (90.7) | 54 (12.0) |          |         |
| Paid another man for anal sex past month                   | Yes         | 191 (32.6) | 13 (6.9)  |          | 0.717   |
|                                                            | No          | 586 (67.4) | 30 (5.1)  |          |         |

| Variable                                         | Category | N (%)      | HIV n(%)  | Positive | p-value |
|--------------------------------------------------|----------|------------|-----------|----------|---------|
| Used a condom with last paid male partner        | No       | 554 (71.3) | 75 (13.5) | 0.059    |         |
|                                                  | Yes      | 223 (28.7) | 21 (9.4)  |          |         |
| Sold sex to another man in past month            | Yes      | 540 (69.5) | 54 (10.0) | 0.771    |         |
|                                                  | No       | 237 (30.5) | 21 (8.9)  |          |         |
| Used a condom with last paying male partner      | No       | 108 (20.0) | 8(7.4)    | 0.041    |         |
|                                                  | Yes      | 432 (80.0) | 60 (13.9) |          |         |
| Had a condom break during anal sex in past month | Yes      | 102 (15.1) | 31 (24.1) | <0.001   |         |
|                                                  | No       | 395 (84.9) | 49 (7.7)  |          |         |
| Ever participated in group sex                   | Yes      | 232 (26.2) | 43 (13.0) | 0.015    |         |
|                                                  | No       | 545 (73.8) | 53 (6.6)  |          |         |

## HIV prevalence

The weighted prevalence of HIV was 8.3% (95%CI: 6.3-10.9). The prevalence increased linearly with age and was significantly higher among those who had had sex with a woman in the past year (11.1% versus 5.5%,  $p=0.023$ ), among those who had used a condom with their last non-paying partner (34.2% versus 12.0%,  $p=0.002$ ), among those who had not used a condom with last paying partner (13.9 versus 7.4%,  $p=0.041$ ) and among those reporting condom breakage during last anal sex (24.1% versus 7.7%,  $p<0.0001$ ). Having engaged in group sex was also associated with higher HIV prevalence (13.0% versus 6.6%,  $p=0.015$ ).

## Comparison of HIV prevalence between 2014 and 2017

In 2014, 753 MSM participated in a survey conducted by the same research group that carried out the present study. The mean age in 2014 was 26.5 years (95%CI: 26.1-27.1) while the mean age in 2017 was 26.0 years (95%CI: 25.5-26.5). The age composition of samples therefore did not differ between the two surveys ( $p<0.0001$ ). No significant statistical differences in other socio-demographic characteristics were

observed between the two samples (Table 3). However, the estimated HIV prevalence in 2017 was less than half that of 2014 (8.3% versus 22.3%,  $p < 0.001$ )

**Table 3: Comparison of Socio-Demographic Characteristics of the 2014 and 2017 Survey Samples**

| Demographic Characteristic            | 2014 (%) | 2017 (%) |
|---------------------------------------|----------|----------|
| <b>Age (years)</b>                    |          |          |
| ≤ 24                                  | 46.3     | 52.1     |
| 25-34                                 | 41.2     | 33.1     |
| ≥ 35                                  | 12.4     | 14.8     |
| <b>Level of education</b>             |          |          |
| No formal education                   | 1.1      | 2.7      |
| Some or completed primary education   | 42.9     | 44.8     |
| Some or completed secondary education | 52.9     | 48.4     |
| Post-secondary education              | 3.1      | 4.1      |
| <b>Marital status</b>                 |          |          |
| Single                                | 83.2     | 78.9     |
| Married/cohabiting                    | 5.9      | 10.8     |
| Separated/divorced/widower            | 6.9      | 10.3     |
| <b>Current living arrangement</b>     |          |          |
| With family                           | 52.5     | 50.6     |
| Alone                                 | 35.3     | 39.1     |
| Boyfriend                             | 5.7      | 6.4      |
| Wife/girlfriend                       | 6.0      | 3.9      |
| <b>Occupation</b>                     |          |          |
| Petty trader                          | 39.8     | 39.1     |
| Employed                              | 17.9     | 22.4     |
| Self employed                         | 33.2     | 42.3     |
| Other                                 | 6.5      | 9.3      |

### Independent risk factors for HIV

The results of bivariate and multivariate logistic regression of independent risk factors for HIV infection are presented in Table 4 and 5. HIV prevalence increased with age, with men aged 25 years and above having 4 times higher risk of infection than those who were between 15 and 19 years. Having had 2 or more receptive non-paying male sexual partners in the last month before the survey was associated with higher odds of HIV infection (AOR=3.0; 95%CI: 1.8-12.0). Having used a condom during last sex with a non-paying partner was also associated with increased risk of testing positive for HIV (AOR=4.1; 95%CI:

1.4-7.8) and those who had ever engaged in group sex had 3 times higher odds of being HIV positive (AOR=3.4; 95%CI: 1.7-13.6). On the other hand, condom use during last anal sex with a paying partner (AOR=0.4, 95%CI: 0.2-0.9) was associated with 60% lower odds of HIV infection.

**Table 4: Weighted Logistic Regression Modelling of the Association between Socio-Demographic Factors and HIV among MSM in Dar es Salaam, Tanzania**

| Variable                    | Category           | OR (95%CI)    | AOR (95%CI) <sup>z</sup> | p-value* |
|-----------------------------|--------------------|---------------|--------------------------|----------|
| Age groups (years)          | 15-19              | 1             | 1                        |          |
|                             | 20-24              | 2.3 (0.9;5.4) | 2.3 (0.9;5.6)            | 0.061    |
|                             | 25-29              | 3.5 (1.5;8.4) | 3.9 (1.6;9.5)            | 0.003    |
|                             | 30-34              | 3.8 (1.6;9.3) | 4.1(1.6;10.4)            | 0.003    |
|                             | 35+                | 3.9 (1.6;9.3) | 4.0 (1.4;5.3)            | 0.004    |
| Education level             | No formal          | 1             |                          |          |
|                             | Primary            | 0.9 (0.3;2.5) |                          |          |
|                             | Secondary          | 1.8 (0.3;2.4) |                          |          |
|                             | Above secondary    | 1.5 (0.5;5.3) |                          |          |
| Marital Status              | Never married      | 1             | 1                        |          |
|                             | Married/cohabiting | 0.5(0.9;1.6)  | 1.0 (0.5;2.2)            | 0.990    |
|                             | Divorced/separated | 1.7(1.1;2.9)  | 1.3 (0.7;2.3)            | 0.375    |
| Time lived in Dar es salaam | Born and raised    | 0.4(0.1;1.1)  | 0.4 (0.1;1.3)            | 0.117    |
|                             | 1-5 years          | 0.6(0.2;1.0)  | 0.6 (0.2;1.3)            | 0.386    |
|                             | 6 and above years  | 0.5(0.2;1.6)  | 0.4 (0.1;1.2)            | 0.147    |
| Income past month (TZS)     | <50,000            | 1             |                          |          |
|                             | 50,000-120,000     | 1.0(0.5;1.8)  |                          |          |
|                             | 121,000-200,000    | 0.9(0.6;1.6)  |                          |          |
|                             | >200,000           | 0.8(0.5;1.4)  |                          |          |
| Currently living with       | Alone              | 1             |                          |          |
|                             | Family             | 0.8(0.6;1.5)  |                          |          |
|                             | Boyfriend          | 1.7(0.9;3.1)  |                          |          |
|                             | Wife/girl friend   | 1.1(0.4;2.9)  |                          |          |

<sup>z</sup> Adjusted for all variables in the table with p-value of  $\leq 0.2$  in the bivariate model; \* p-value for adjusted OR

**Table 5: Weighted Logistic Regression Modelling of Association between Sex-Related Risk Factors and HIV among MSM in Dar es Salaam, Tanzania**

| Variable                                                                  | Category    | OR (95%CI)    | AOR (95%CI) <sup>z</sup> | p-value* |
|---------------------------------------------------------------------------|-------------|---------------|--------------------------|----------|
| Age at sexual debut                                                       | ≤ 15        | 1             |                          |          |
|                                                                           | 16-18       | 0.8(0.5;1.2)  |                          |          |
|                                                                           | >18         | 0.8(0.5;1.3)  |                          |          |
| Had sex with a woman past 12 months                                       | No          | 1             | 1.                       | 0.861    |
|                                                                           | Yes         | 0.5(0.3;0.7)  | 0.9(0.6;1.2)             |          |
| Bought sex past one year                                                  | No          | 1             | 1                        | 0.370    |
|                                                                           | Yes         | 1.1(0.7;1.4)  | 1.7(0.6;3.0)             |          |
| Sold sex past one year                                                    | Yes         | 1             |                          |          |
|                                                                           | No          | 0.8(0.2;5.1)  |                          |          |
| Number of male receptive partners where no payment is involved past month | 1           | 1             | 1                        | 0.000    |
|                                                                           | 2 and above | 1.6(1.1;7.5)  | 3.0(1.8;12.0)            |          |
| Number of non-paying insertive male partners past month                   | 1           | 1             | 1                        | 0.531    |
|                                                                           | 2 and above | 1.5(0.5;11.2) | 1.6(0.4;23.1)            |          |
| Used a condom with last receptive non-paying partner                      | No          | 1             | 1                        | 0.000    |
|                                                                           | Yes         | 3.1(1.2;7.2)  | 4.1(1.4;7.8)             |          |
| Paid another man for anal sex past month                                  | No          | 1             | 1                        | 0.142    |
|                                                                           | Yes         | 1.5(0.5;9.2)  | 1.6(0.6;11.8)            |          |
| Used a condom with last paid male partner                                 | Yes         | 1             | 1                        | 0.284    |
|                                                                           | No          | 1.1(0.5;2.1)  | 1.5(0.7;3.0)             |          |
| Used a condom with last paying male partner                               | Yes         | 1             | 1                        | 0.000    |
|                                                                           | No          | 0.6(0.3;1.0)  | 0.4(0.2;0.9)             |          |
| Sold sex to another man past month                                        | No          | 1             | 1                        | 0.156    |
|                                                                           | Yes         | 1.3(0.7;2.2)  | 2.5(0.7;8.5)             |          |
| Had a condom break during anal sex in past month                          | No          | 1             | 1                        | 0.431    |
|                                                                           | Yes         | 1.5(1.7;3.6)  | 1.2(0.7;2.1)             |          |
| Ever participated in group sex                                            | No          | 1             | 1                        | 0.000    |
|                                                                           | Yes         | 3.1(1.2;15.6) | 3.4(1.7;13.6)            |          |

<sup>z</sup> Adjusted for all variables in the table with p-value of ≤0.2 in the bivariate model; \* p-value for adjusted OR



## DISCUSSION

This study examined HIV prevalence among MSM in Dar es Salaam after the national guideline on CHIP had been under implementation in Tanzania since 2014. The estimated HIV prevalence was 8.3% (95%CI: 6.3-10.9), as compared to 22.3% (95%CI: 18.7-26.4) in 2013 [4]. This observation suggests that the HIV prevalence in this population has decreased by 62 percent over the past 5 years. The observed decline is substantial and statistically significant. The socio-demographic characteristics of the 2013 and 2017 survey samples did not differ significantly, suggesting that differences in the study population structure may not explain the observed decline. The difference from 2013 would be even greater if our current estimates were compared to another study conducted among MSM in Dar es Salaam that year. That study (albeit based on a sample of only 200 MSM) reported an HIV prevalence of 30.2% among MSM [6].

The present survey is the first study ever to report declining HIV prevalence among MSM in Tanzania. The decline echoes the dynamic of the overall HIV situation in Tanzania, where HIV prevalence in the general population has been steadily decreasing over the past decade, from 7.0% in 2003 to 4.7% in 2016 [2, 3]. Similar trends of decreasing HIV prevalence in key population groups alongside that in the general population have also been reported elsewhere [7, 9, 22].

Despite the reported decrease, the HIV prevalence among MSM is still twice as high as that among men in the general population in Dar es Salaam. For this reason, recent calls for continued efforts to address HIV in high-risk populations made by the authors of a systematic review of the global epidemiology of HIV among MSM [8] is still very relevant also in Dar es Salaam.

Sexual practices associated with HIV risk continue to be common among MSM in Dar es Salaam, and were significantly associated with HIV seropositivity. A substantial proportion of men have multiple

1  
2  
3 sexual partnerships and engage in group sex, as has also been reported earlier both in Tanzania and  
4 elsewhere in Sub-Saharan Africa [4, 5, 12, 23, 24].  
5  
6

7  
8 Men aged 25 and above had higher HIV prevalence than those who were younger in this study, similar  
9  
10 to what has been reported earlier in Dar es Salaam and elsewhere in Africa [4, 5, 10, 11]. A higher HIV  
11 prevalence among older men may reflect accumulation of risk over time and/or higher survival following  
12 ongoing efforts to improve linkage to care for people testing positive for HIV. The most recent AIDS  
13 indicator survey in Tanzania reported that 90.9% of persons who were between 15 and 64 years of age  
14 and who knew their HIV status indicated that they were on antiretroviral treatment, and 87.7% were  
15 virally suppressed [2]. However, HIV testing coverage in the country is still low with only 52.2% of  
16 people living with HIV knowing their HIV status (in the 15-64 age bracket) [2].  
17  
18  
19  
20  
21  
22  
23  
24  
25

26 More than half of our study participants reported to have had sex with more than 2 partners. Moreover,  
27 transactional sex was very common in this population, with 64% reporting to have paid for sex during  
28 the past month, and 79% reporting to have sold sex during the last month. However, a striking finding  
29 was that condom use was very common among MSM who engaged in commercial sex. Condom use  
30 during last commercial sex was reported by a total of 80% of the study participants as compared to 49%  
31 in 2013 [4]. A significant increase in condom use among MSM following preventive education has  
32 recently been reported in a cohort of MSM in West Africa [22]. We found that condom use with paying  
33 partners (commercial sex) was associated with a 60% lower likelihood of HIV infection in this study.  
34  
35  
36  
37  
38  
39  
40  
41  
42  
43  
44  
45 This increase in protected commercial sex may partly explain the decreased HIV prevalence observed  
46 in this study.  
47  
48

49 On the other hand, condom use with regular (non-paying) partners was low in this study (9.3%), but  
50 comparable to that found in other studies of key populations in Tanzania [25]. Low perceived  
51 susceptibility and a sense of trusting a regular partner are factors that have been associated with condom-  
52  
53  
54  
55  
56  
57  
58  
59  
60

1  
2  
3 less sex [26, 27]. Worth noting in this study is the finding that condom use with regular partners was  
4 significantly associated with HIV seropositivity. It is possible that this reflects that some HIV positive  
5 MSM use condoms when they engage in sex to ensure the safety of their partners. This has also been  
6 reported in other studies in Asia and Africa [16, 28, 29].  
7

8  
9  
10  
11  
12 As was the case in our 2014 study among MSM in Dar es Salaam, nearly one-third of the study  
13 participants reported to have engaged in group sex [4], and group sex was associated with HIV infection.  
14 This underscores the need for tailored preventive messaging addressing safer group sex in implementing  
15 the CHIP [2, 17].  
16

17  
18  
19  
20  
21 The results of this study should be interpreted in light of the following limitations. Firstly, the cross-  
22 sectional nature of the survey limit causal inference of the risk factors for HIV infection identified.  
23 However, most of the risk factors reported have also been studied and reported in well-designed  
24 longitudinal studies. Secondly, participants were recruited using respondent driven sampling  
25 methodology which is not a random sampling methodology. Despite the fact that we used special  
26 statistical software (RDSAT) and controlled for network sizes during analysis, we acknowledge the  
27 potential for bias. And thirdly, we collected sensitive sexual behavior data which are subject to  
28 desirability bias. The design of the questionnaire, interviewers training, privacy setting of interview  
29 venues and establishment of good rapport with participants were put in place to reduce desirability  
30 reporting.  
31  
32  
33  
34  
35  
36  
37  
38  
39  
40  
41  
42  
43

## 44 **CONCLUSION**

45  
46  
47 The HIV prevalence among MSM in Dar es Salaam has decreased by more than half over the past 5 years,  
48 coinciding with the implementation of the CHIP in Tanzania. Despite of the considerable decrease, the  
49 HIV prevalence in this population still remains twice as high as that among men in general. More condom  
50 protected anal sex could have played a role in the declining HIV prevalence among MSM. Efforts to  
51  
52  
53  
54  
55  
56  
57  
58  
59  
60

1  
2  
3 promote safer sex among men who engage in multiple sexual partnerships and group sex are called for.  
4  
5 The roll out of new intervention measures, such as pre-exposure prophylaxis, could significantly  
6  
7 contribute in the ongoing efforts to end the epidemic  
8  
9  
10  
11

### 12 **Funding**

13 The work was supported by funding from Danida Fellowship Centre (DFC) through Project No. 16-P03-  
14  
15 TAN and Global Fund to Fight AIDS, Tuberculosis, and Malaria through Tanzania National AIDS Control  
16  
17 Programme.  
18  
19

### 20 **Competing interest statement**

21  
22  
23 Authors declare that they have no competing interest.  
24

### 25 **Authors contributions**

26  
27 AM analyzed data, interpreted results and drafted the manuscript. EJM designed the study, analyzed data  
28  
29 and interpreted results. KM, GHL, TL, NM, AR, MTL, DM and BT designed the study and interpreted  
30  
31 the results. SL and MM, collected data and interpreted the results. All authors revised and approved the  
32  
33 final version of the manuscript.  
34  
35

### 36 **Data availability**

37  
38  
39 Data are available from the corresponding authors upon reasonable request.  
40

### 41 **Participants consent**

42  
43  
44 All participants provided written informed consent before interview or blood specimen collection.  
45  
46  
47

## 48 **REFERENCES**

- 49  
50  
51 1. **GBD HC: Estimates of global, regional, and national incidence, prevalence, and mortality of**  
52 **HIV, 1980-2015: the Global Burden of Disease Study 2015. Lancet HIV. 2016 Aug;3(8):.**  
53 *Lancet HIV* 2016, 3(8):e408.  
54 2. **NBS: Tanzania HIV Impact Survey 2016-2017: Preliminary Findings.** In. Edited by Statistics.  
55 NBo. Dar es Salaam: NBS, NACP; 2017.  
56  
57

3. Fleiss J, Levin B, Paik M. *Statistical Methods for Rates and Proportions*. 3<sup>rd</sup> Edition. Published by John Wiley & Sons, 2003.
- Zanzibar AIDS Commission (ZAC) NBoSN, Office of the Chief Government Statistician (OCGS), ICF International: **Tanzania HIV/AIDS and Malaria Indicator Survey 2011-2012**. Dar es salaam, Tanzania: . In. Dar es Salaam, Tanzania: Zanzibar AIDS Commission (ZAC), National Bureau of Statistics (NBS), Office of the Chief Government Statistician (OCGS), ICF International; 2013.
4. Mmbaga EJ MK, Leyna GH, Mpembeni R, Leshabari MT: **HIV Prevalence and Associated Risk Factors Among Men Who Have Sex With Men in Dar es Salaam, Tanzania**. *J Acquir Immune Defic Syndr* 2018, **77**(3):243-249.
  5. Mmbaga EJ MK, Makyao N, Mpembeni R, Leshabari MT: **HIV and STI s among men who have sex with men in Dodoma municipality, Tanzania: a cross-sectional study**. *Sex Transm Infect* 2017, **93**(5):314-319.
  6. Ross MW NJ, Ahaneku HO, Mbwambo J, McClelland RS, McCurdy SA **High HIV seroprevalence, rectal STIs and risky sexual behavior in men who have sex with men in Dar es Salaam and Tanga, Tanzania**. *BMJ Open* 2014, **4**(8):e006175.
  7. Baral SD GA, Holland C, Papworth E.: **The epidemiology of HIV among men who have sex with men in countries with generalized HIV epidemics**. *Curr Opin HIV AIDS* 2014, **9**(2):156–167. .
  8. Beyrer C BS, van Griensven F, Goodreau SM, Chariyalertsak S, Wirtz AL, et al.: **Global epidemiology of HIV infection in men who have sex with men**. *Lancet* 2012, **380**(9839):367–377.
  9. Djomand G QS, Sullivan PS **HIV epidemic among key populations in west Africa**. *Curr Opin HIV AIDS* 2014, **9**(5):506-513.
  10. Ferré VM G-KF, Collin G, Dagnra AC, Le Hingrat Q, Jaquet A, Salou M, Descamps D, Charpentier C, Ekouevi DK.: **Prevalence of Human Papillomavirus, HIV and other sexually transmitted infections among men having sex with men in Togo: a national cross-sectional survey**. *Clin Infect Dis* 2019, **6**( doi: 10.1093/cid/ciy1012.).
  11. Hladik W BJ, Ssenkusu JM, Opio A, Tappero JW, Hakim A, et al. : **HIV Infection among Men Who Have Sex with Men in Kampala, Uganda—A Respondent Driven Sampling Survey**. *PLoS One* 2012, **7**(5).
  12. Ouedraogo HG K-ZO, Grosso A, Goodman S, Samadoulougou BC, Tarnagda G, Baguiya A, Tiendrebeogo S, Lougue M, Sawadogo N, Traore Y, Barro N, Baral S, Kouanda S. : **Human immunodeficiency virus (HIV) among men who have sex with men: results of the first integrated biological and behavioral survey in Burkina Faso, West Africa**. . *BMC Public Health* 2019, **19**(1):5. doi: 10.1186/s12889-12018-16361-12881.
  13. Dahoma M JL, Holman A: **HIV and related risk behavior among men who have sex with men in Zanzibar, Tanzania: results of a behavioral surveillance survey**. *AIDS Behav* 2011, **15**:186-196.
  14. Baral S SF, Cleghorn F, Beyrer C.: **Elevated risk for HIV infection among men who have sex with men in low- and middle-income countries 2000-2006: a systematic review**. *PLoS Med* 2007, **4**(12):e339.
  15. Dahoma MJ SA, Abdool R: **HIV and substance abuse: the dual epidemics challenging Zanzibar**. *African Journal of Drugs and Alcohol Studies* 2006, **5**:129–138.

16. Merrigan M AA, Afolabi B, Chabikuli ON, Onyekwena O, Eluwa G, et al.: **HIV prevalence and risk behaviours among men having sex with men in Nigeria.** *Sex Transm Infect* 2011, **87**(1):65–70.
17. UNAIDS: **90–90–90—an ambitious treatment target to help end the AIDS epidemic.** . In: <http://www.unaids.org/en/resources/documents/2014/90-90-90> (accessed September 10, 2019). Geneva, Switzerland: UNAIDS; 2014.
18. Programme NAC: **Comprehensive Guideline for HIV prevention among Key Population in Tanzania.** . In. Dar es Salaam, Tanzania: NACP; 2016.
19. Mmbaga EJ LG, Mpembeni R, Moen K, Makyao N, Leshabari M: **Intergrated Biobehavioral Survey among men who have sex with men in dar es salaam, Tanzania.** In. Dar es Salaam, Tanzania: National AIDS Control Program, MUHAS; 2014.
20. DD. H: **Respondent-Driven Sampling II: Deriving Valid Population Estimates from Chain-Referral Samples of Hidden Populations.** *Soc Probl* 2002, **49**(1):11–34.
21. DD H: **Snowball versus respondent-driven sampling.** *Sociol Methodol* 2011, **41**(1):355-366.
22. Coulaud PJ S-TL, Mimi M, Maradan G et al.: **Changes in risky sexual behaviours among West African MSM enrolled in a quarterly HIV testing and counselling prevention programme.** *Sex Transm Infect* 2019, **2019 Aug 1**. pii: **sextrans-2018-053892.** .
23. Mgbako O PS, Callander D, Brinker D, Kuhner C, Carrico A: **Transactional sex, condomless anal sex, and HIV risk among men who have sex with men.** *Int J STD & AIDS* 2019, **30**(8):795–801.
24. Coulaud PJ S-TL, m Mimi M, M'madi Mrenda B, Maradan G et al. : **Combined Sexual Behavioral Profiles in HIV-Seronegative Men Who have Sex with Men in West Africa** *Arch Sex Behav* 2019, **2019 Aug 9**. doi: **10.1007/s10508-019-01513-z.** .
25. Mbita G MA, Plotkin M, Casalini C, Shao A, Lija G, Boyee D, Ramadhan A, Makyayo N, Mlange R, Bandio R, Christofeld M, Komba A.: **Consistent Condom Use and Dual Protection Among Female Sex Workers: Surveillance Findings from a Large-Scale, Community-Based Combination HIV Prevention Program in Tanzania** *AIDS Behav* 2019, **2019 Aug 23**. doi: **10.1007/s10461-019-02642-1.**
26. Manjengwa PG MK, Musekiwa A, Kuonza LR. : **Cognitive and behavioural determinants of multiple sexual partnerships and condom use in South Africa: Results of a national survey.** *South Afr J HIV Med* 2019, **20**(1):868. doi: 810.4102/sajhivmed.v4120i4101.4868. .
27. Giano Z KK, Durham AR, Currin JM, Wheeler DL, Croff JM, Hubach RD.: **Factors Associated with Condom Use among a Sample of Men Who Have Sex with Men (MSM) Residing in Rural Oklahoma.** *J Homosex* 2019, **May 24**:1-21. doi: **10.1080/00918369.2019.1616430.** .
28. Deuba K KV, Koirala S for the CAT-S group, et al: **Condom use behaviour among people living with HIV: a seven-country community-based participatory research in the Asia-Pacific region.** *Sex Transm Infect* 2018, **94**:200-205. .
29. Tobin-West CI NS, Maduka O, Oranu E, Onyekwere VN, Tamuno I. : **Exploring the HIV-risk practices of men who have sex with men in Port Harcourt city, Nigeria.** *Ann Trop Med Public Health* 2017, **10**(3):551.

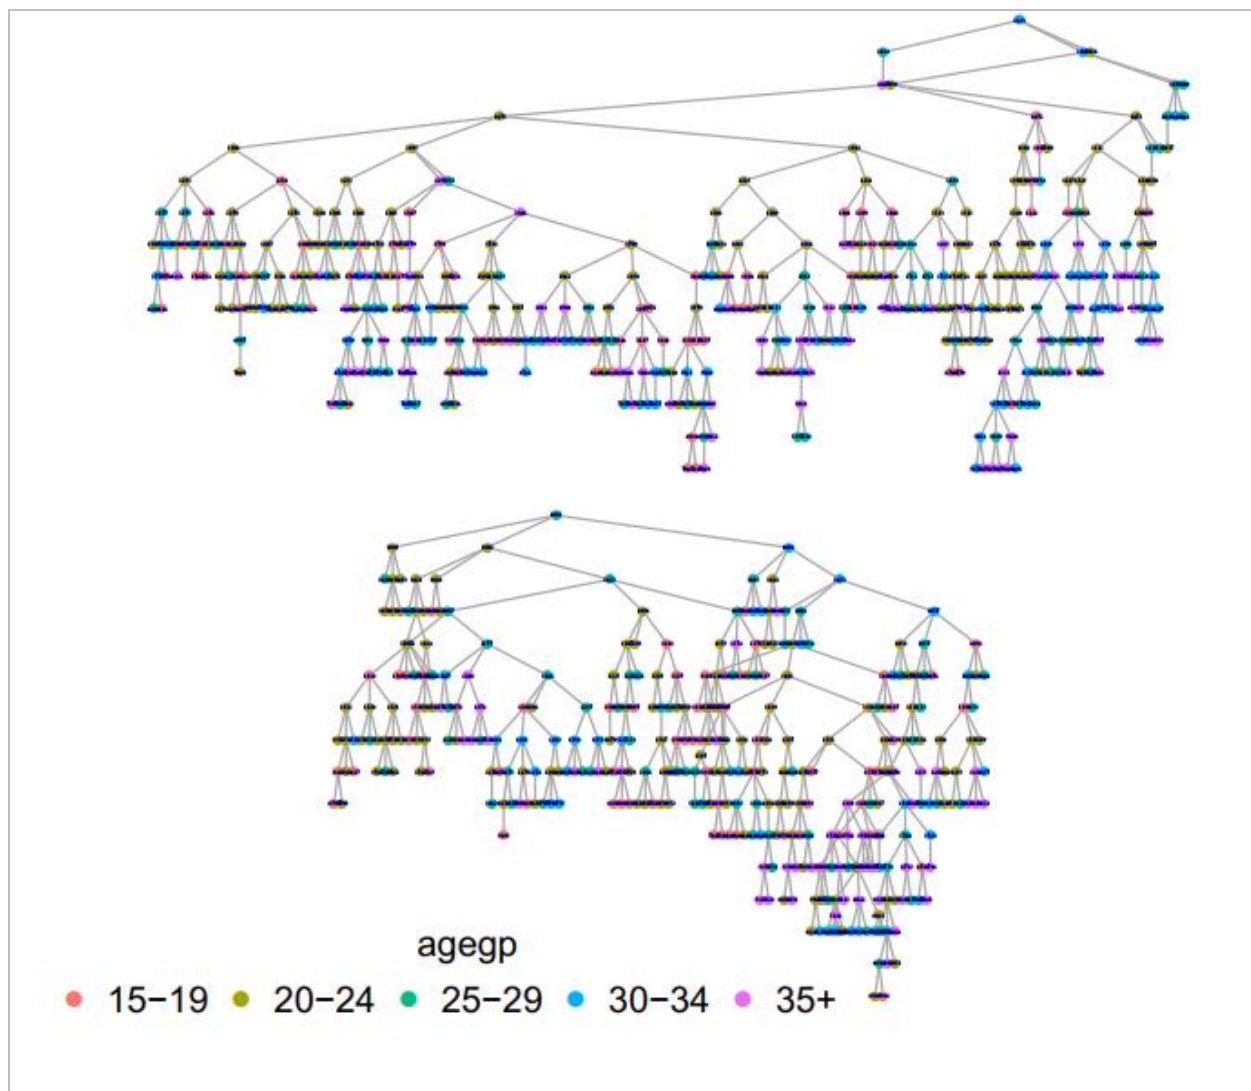

**Figure 1: Recruitment networks by age groups**

STROBE Statement—Checklist of items that should be included in reports of *cross-sectional studies*

|                              | Item No | Recommendation                                                                                                                                                                                               | Page No |
|------------------------------|---------|--------------------------------------------------------------------------------------------------------------------------------------------------------------------------------------------------------------|---------|
| <b>Title and abstract</b>    | 1       | (a) Indicate the study's design with a commonly used term in the title or the abstract                                                                                                                       | 01      |
|                              |         | (b) Provide in the abstract an informative and balanced summary of what was done and what was found                                                                                                          | 02      |
| <b>Introduction</b>          |         |                                                                                                                                                                                                              |         |
| Background/rationale         | 2       | Explain the scientific background and rationale for the investigation being reported                                                                                                                         | 03      |
| Objectives                   | 3       | State specific objectives, including any prespecified hypotheses                                                                                                                                             | 04      |
| <b>Methods</b>               |         |                                                                                                                                                                                                              |         |
| Study design                 | 4       | Present key elements of study design early in the paper                                                                                                                                                      | 04      |
| Setting                      | 5       | Describe the setting, locations, and relevant dates, including periods of recruitment, exposure, follow-up, and data collection                                                                              | 04      |
| Participants                 | 6       | (a) Give the eligibility criteria, and the sources and methods of selection of participants                                                                                                                  | 05      |
| Variables                    | 7       | Clearly define all outcomes, exposures, predictors, potential confounders, and effect modifiers. Give diagnostic criteria, if applicable                                                                     | 6-7     |
| Data sources/<br>measurement | 8*      | For each variable of interest, give sources of data and details of methods of assessment (measurement). Describe comparability of assessment methods if there is more than one group                         | 5-7     |
| Bias                         | 9       | Describe any efforts to address potential sources of bias                                                                                                                                                    | 5-7     |
| Study size                   | 10      | Explain how the study size was arrived at                                                                                                                                                                    | 05      |
| Quantitative variables       | 11      | Explain how quantitative variables were handled in the analyses. If applicable, describe which groupings were chosen and why                                                                                 | 6-7     |
| Statistical methods          | 12      | (a) Describe all statistical methods, including those used to control for confounding                                                                                                                        | 6-7     |
|                              |         | (b) Describe any methods used to examine subgroups and interactions                                                                                                                                          | 6-7     |
|                              |         | (c) Explain how missing data were addressed                                                                                                                                                                  | -       |
|                              |         | (d) If applicable, describe analytical methods taking account of sampling strategy                                                                                                                           | 6-7     |
|                              |         | (e) Describe any sensitivity analyses                                                                                                                                                                        | 6-7     |
| <b>Results</b>               |         |                                                                                                                                                                                                              |         |
| Participants                 | 13*     | (a) Report numbers of individuals at each stage of study—eg numbers potentially eligible, examined for eligibility, confirmed eligible, included in the study, completing follow-up, and analysed            | 7       |
|                              |         | (b) Give reasons for non-participation at each stage                                                                                                                                                         | 7-8     |
|                              |         | (c) Consider use of a flow diagram                                                                                                                                                                           | -       |
| Descriptive data             | 14*     | (a) Give characteristics of study participants (eg demographic, clinical, social) and information on exposures and potential confounders                                                                     | 8       |
|                              |         | (b) Indicate number of participants with missing data for each variable of interest                                                                                                                          | 8       |
| Outcome data                 | 15*     | Report numbers of outcome events or summary measures                                                                                                                                                         | 9       |
| Main results                 | 16      | (a) Give unadjusted estimates and, if applicable, confounder-adjusted estimates and their precision (eg, 95% confidence interval). Make clear which confounders were adjusted for and why they were included | 12      |



|                          |    |                                                                                                                                                                            |       |
|--------------------------|----|----------------------------------------------------------------------------------------------------------------------------------------------------------------------------|-------|
|                          |    | (b) Report category boundaries when continuous variables were categorized                                                                                                  | 12-13 |
|                          |    | (c) If relevant, consider translating estimates of relative risk into absolute risk for a meaningful time period                                                           | 12-13 |
| Other analyses           | 17 | Report other analyses done—eg analyses of subgroups and interactions, and sensitivity analyses                                                                             | 12-13 |
| <b>Discussion</b>        |    |                                                                                                                                                                            |       |
| Key results              | 18 | Summarise key results with reference to study objectives                                                                                                                   | 14    |
| Limitations              | 19 | Discuss limitations of the study, taking into account sources of potential bias or imprecision. Discuss both direction and magnitude of any potential bias                 | 03    |
| Interpretation           | 20 | Give a cautious overall interpretation of results considering objectives, limitations, multiplicity of analyses, results from similar studies, and other relevant evidence | 16    |
| Generalisability         | 21 | Discuss the generalisability (external validity) of the study results                                                                                                      | 16    |
| <b>Other information</b> |    |                                                                                                                                                                            |       |
| Funding                  | 22 | Give the source of funding and the role of the funders for the present study and, if applicable, for the original study on which the present article is based              | 16    |

\*Give information separately for exposed and unexposed groups.

**Note:** An Explanation and Elaboration article discusses each checklist item and gives methodological background and published examples of transparent reporting. The STROBE checklist is best used in conjunction with this article (freely available on the Web sites of PLoS Medicine at <http://www.plosmedicine.org/>, Annals of Internal Medicine at <http://www.annals.org/>, and Epidemiology at <http://www.epidem.com/>). Information on the STROBE Initiative is available at [www.strobe-statement.org](http://www.strobe-statement.org).

# BMJ Open

## HIV Prevalence among Men Who Have Sex with Men following the Implementation of the HIV Preventive Guideline in Tanzania: Respondent Driven Sampling Survey

|                                 |                                                                                                                                                                                                                                                                                                                                                                                                                                                                                                                                                                                                                                                                                                                                                                                                                                                                                                                                                                                                                                           |
|---------------------------------|-------------------------------------------------------------------------------------------------------------------------------------------------------------------------------------------------------------------------------------------------------------------------------------------------------------------------------------------------------------------------------------------------------------------------------------------------------------------------------------------------------------------------------------------------------------------------------------------------------------------------------------------------------------------------------------------------------------------------------------------------------------------------------------------------------------------------------------------------------------------------------------------------------------------------------------------------------------------------------------------------------------------------------------------|
| Journal:                        | <i>BMJ Open</i>                                                                                                                                                                                                                                                                                                                                                                                                                                                                                                                                                                                                                                                                                                                                                                                                                                                                                                                                                                                                                           |
| Manuscript ID                   | bmjopen-2019-036460.R2                                                                                                                                                                                                                                                                                                                                                                                                                                                                                                                                                                                                                                                                                                                                                                                                                                                                                                                                                                                                                    |
| Article Type:                   | Original research                                                                                                                                                                                                                                                                                                                                                                                                                                                                                                                                                                                                                                                                                                                                                                                                                                                                                                                                                                                                                         |
| Date Submitted by the Author:   | 21-Jul-2020                                                                                                                                                                                                                                                                                                                                                                                                                                                                                                                                                                                                                                                                                                                                                                                                                                                                                                                                                                                                                               |
| Complete List of Authors:       | Alexander Ishungisa, Mwijage; Muhimbili University of Health and Allied Sciences, Behavioral Sciences; Muhimbili University of Health and Allied Sciences, Medical Botany, Plant Breeding and Agronomy<br>Moen, Kare; University of Oslo<br>Leyna, Germana; Muhimbili University of Health and Allied Sciences, Public Health and Social Sciences<br>Makyao, Neema; Tanzania National AIDS control Program<br>Ramadhan, Angela; Kilimanjaro Christian Medical University College<br>Lange, Theis; University of Copenhagen, Section of Biostatistics<br>Meyrowitsch, Dan; University of Copenhagen, Global Health Section<br>Mizinduko, Mucho; Muhimbili University of Health and Allied Sciences, Epidemiology<br>Likindikoki, Samuel; Muhimbili University of Health and Allied Sciences<br>Leshabari, Melkizedeck; Muhimbili University College of Health Sciences<br>Mmbaga, Elia John; Muhimbili Univ Hlth , Epidemiology and Biostatistics; Universitetet i Oslo Avdeling for samfunnsmedisin, Community Medicine and Global Health |
| <b>Primary Subject Heading</b>: | HIV/AIDS                                                                                                                                                                                                                                                                                                                                                                                                                                                                                                                                                                                                                                                                                                                                                                                                                                                                                                                                                                                                                                  |
| Secondary Subject Heading:      | Epidemiology, Public health, Sexual health                                                                                                                                                                                                                                                                                                                                                                                                                                                                                                                                                                                                                                                                                                                                                                                                                                                                                                                                                                                                |
| Keywords:                       | HIV & AIDS < INFECTIOUS DISEASES, Infection control < INFECTIOUS DISEASES, Public health < INFECTIOUS DISEASES, EPIDEMIOLOGY                                                                                                                                                                                                                                                                                                                                                                                                                                                                                                                                                                                                                                                                                                                                                                                                                                                                                                              |
|                                 |                                                                                                                                                                                                                                                                                                                                                                                                                                                                                                                                                                                                                                                                                                                                                                                                                                                                                                                                                                                                                                           |

SCHOLARONE™  
Manuscripts



I, the Submitting Author has the right to grant and does grant on behalf of all authors of the Work (as defined in the below author licence), an exclusive licence and/or a non-exclusive licence for contributions from authors who are: i) UK Crown employees; ii) where BMJ has agreed a CC-BY licence shall apply, and/or iii) in accordance with the terms applicable for US Federal Government officers or employees acting as part of their official duties; on a worldwide, perpetual, irrevocable, royalty-free basis to BMJ Publishing Group Ltd ("BMJ") its licensees and where the relevant Journal is co-owned by BMJ to the co-owners of the Journal, to publish the Work in this journal and any other BMJ products and to exploit all rights, as set out in our [licence](#).

The Submitting Author accepts and understands that any supply made under these terms is made by BMJ to the Submitting Author unless you are acting as an employee on behalf of your employer or a postgraduate student of an affiliated institution which is paying any applicable article publishing charge ("APC") for Open Access articles. Where the Submitting Author wishes to make the Work available on an Open Access basis (and intends to pay the relevant APC), the terms of reuse of such Open Access shall be governed by a Creative Commons licence – details of these licences and which [Creative Commons](#) licence will apply to this Work are set out in our licence referred to above.

Other than as permitted in any relevant BMJ Author's Self Archiving Policies, I confirm this Work has not been accepted for publication elsewhere, is not being considered for publication elsewhere and does not duplicate material already published. I confirm all authors consent to publication of this Work and authorise the granting of this licence.

# HIV Prevalence among Men Who Have Sex with Men following the Implementation of the HIV Preventive Guideline in Tanzania: Respondent Driven Sampling Survey

Alexander Mwijage<sup>1</sup>, Kåre Moen<sup>2</sup>, Germana Henry Leyna<sup>3,4</sup>, Neema Makyao<sup>5</sup>, Angela Ramadhan<sup>5</sup>, Theis Lange<sup>6</sup>, Dan Wolf Meyrowitsch<sup>6</sup>, Mucho Mizinduko<sup>3</sup>, Samuel Likindikoki<sup>3</sup>, Melkzedek Thomas Leshabari<sup>1</sup>, Elia John Mmbaga<sup>2,3</sup>

<sup>1</sup>*Department of Behavioral Sciences, Muhimbili University of Health and Allied Sciences, Dar es Salaam, Tanzania,*

<sup>2</sup>*Department of Community Medicine and Global Health, Institute of Health and Society, University of Oslo, Norway,*

<sup>3</sup>*Department of Epidemiology and Biostatistics, Muhimbili University of Health and Allied Sciences, Dar es Salaam, Tanzania,*

<sup>4</sup>*Tanzania Food and Nutrition Centre, Dar es Salaam, Tanzania*

<sup>5</sup>*Ministry of Health Community Development, Gender, Elderly and Children, Dodoma, Tanzania, and*

<sup>6</sup>*Department of Public Health, University of Copenhagen, Copenhagen, Denmark*

## **Corresponding author's address:**

Muhimbili University of Health and Allied Sciences,

9 United Nations Road,

P.O BOX 56001, Dar es Salaam, Tanzania

Email: [mwijagealexander2014@yahoo.com](mailto:mwijagealexander2014@yahoo.com)

Phone: +255752194077

## ABSTRACT

**Objectives:** To estimate HIV prevalence and associated risk factors among men who have sex with men (MSM) in Dar es Salaam, Tanzania following the implementation of the national comprehensive package of HIV interventions for key populations (CHIP).

**Design:** A cross-sectional survey using respondent-driven sampling

**Setting:** Dar es Salaam, Tanzania's largest city.

**Participants:** Men who occasionally or regularly have sex with another man, aged 18 years and above and living in Dar es Salaam city at least six months preceding the study.

**Primary outcome measure:** HIV prevalence was the primary outcome. Independent risk factors for HIV infection were examined using weighted logistics regression modelling.

**Results:** A total of 777 MSM with a mean age of 26 years took part in the study. The weighted HIV prevalence was 8.3% (95%CI: 6.3-10.9) as compared to 22.3% (95%CI: 18.7-26.4) observed in a similar survey in 2014. Half of the participants had had sex with more than 2 partners in the month preceding the survey. Among those who had engaged in transactional sex, 80% had used a condom during last anal sex with a paying partner. Participants aged 25 and above had 4 times higher odds of being infected than those aged 15-19. HIV infection was associated with multiple sexual partnerships (AOR, 3.0; 95%CI: 1.8-12.0), not having used condom during last sex with non-paying partner (AOR, 4.1; 95%CI: 1.4-7.8), and ever having engaged in group sex (AOR, 3.4; 95%CI: 1.7-13.6).

**Conclusion:** HIV prevalence among MSM in Dar es Salaam has decreased by more than a half over the past 5 years, coinciding with implementation of the CHIP. It is nonetheless twice as high as that of men in the general population. To achieve the 2030 goal, behavioral change interventions and roll-out of new intervention measures such as pre-exposure prophylaxis are urgently needed.

**Keywords:** Men who have sex with men; HIV prevalence; risk behaviors; National guideline for comprehensive package of HIV intervention for key population; Tanzania

### Strengths and limitations of this study

- This is the largest respondent driven sampling survey among MSM in Tanzania and study participants were recruited from diverse strata of the population.
- The results were weighted to control for network size and clustering resulting from variations in selection probability and network sizes in respondent driven sampling
- Comparisons are made with HIV prevalence estimates generated in a methodologically comparable survey conducted before the launch of the National guideline for comprehensive package of HIV intervention for key population (CHIP).
- Data on sexual behavior is subject to social desirability bias.
- This study did not measure biological risk factors for HIV infection which might have provided more insight into the risk profile of this population.

## Background

Since 2004, the rate of HIV infection has been declining globally including in Tanzania [1]. The Tanzania HIV Indicator and Impact Surveys indicate that the HIV prevalence among persons aged 15-49 decreased from 7% in 2004 to 4.7% in 2016 [2, 3]. The observed decrease has been attributed to concerted efforts to promote condom use and to an improved HIV testing coverage with 90.9% linkage to antiretroviral therapy (ART) among those who test positive for HIV and 87.7% viral suppression [2].

While evidence of declining overall HIV infection rates has been mounting, populations at higher risk of HIV infection, such as MSM, have continued to carry a disproportionate burden of HIV in Africa and beyond. Studies from Africa have indicated that the HIV prevalence among MSM are 2 to 20 times higher than that in the general population [4-12]. Recent studies have estimated the HIV prevalence among MSM in Tanzania to range from 12.5% in Zanzibar to 22.3% in Dar es Salaam and 11.1% in Tanga [4, 6, 13]. Practices associated with increased risk of HIV, such as multiple sexual partnerships, unprotected anal sex, group sex, alcohol and drug use, and commercial sex have been commonly reported among MSM [4, 9, 13-16]. A high prevalence of sexually transmitted infections, such as herpes simplex virus type 2, has also been associated with high infection rates among MSM [4, 6, 10, 12, 14].

Populations at increased risk of HIV infection have been estimated to contribute up to 30% of new HIV infections in sub-Saharan Africa, making it impossible to leave them behind if we are to achieve the ambitious third sustainable development goal and end the HIV epidemic by 2030 [7, 17].

In 2014, Tanzania launched a National guideline for comprehensive package of HIV intervention for key population (CHIP) coupled with training of healthcare workers and the embracement of a multi-sectorial approach to control the HIV epidemic [18]. CHIP provided a detailed description of preventive, curative and psycho-social interventions key population including MSM should receive when seeking healthcare services. Specifically, the guideline directed health care workers to provide HIV counseling and testing,

1  
2  
3 screening for sexually transmitted infections, condoms, Male health education, and pre-and post-exposure  
4 prophylaxis as part of the preventive package. Screening for tuberculosis and other opportunistic  
5 infections, vaccination and treatment of viral hepatitis, anti-retroviral therapy and nutrition were among  
6 the treatment and care package services. Psycho-social support component of the package included mental  
7 health services, legal advices, personal development and empowerment as well as establishment of peer  
8 support groups. The roll out of CHIP alongside training of healthcare workers aimed to reduce stigma,  
9 increase service access with the ultimate goal of reduction in HIV infection rate among MSM.

10  
11  
12  
13  
14  
15  
16  
17  
18  
19 Nearly half a decade later, no study has evaluated the state of the HIV epidemic in key populations. Given  
20 the notable decrease in HIV infection rates in Tanzania's general population, it is important that the  
21 dynamic of the HIV epidemic is tracked also in these populations as to inform government efforts aiming  
22 to achieve the 2030 goal [2]. This study seeks to provide information on the prevalence of HIV and  
23 associated sexual behavior-related risk factors among MSM in Dar es Salaam following nearly half a  
24 decade of implementation of CHIP.  
25  
26  
27  
28  
29  
30  
31  
32  
33  
34

## 35 **METHODS**

### 36 **Design and setting**

37  
38  
39  
40 This was a cross sectional integrated bio-behavioral surveillance (IBBS) survey among MSM conducted  
41 between October and December 2017 in Dar es Salaam, the largest city in Tanzania. The location was  
42 chosen because it has a large population of MSM and a high prevalence of HIV, and also because baseline  
43 data were available for comparison (i.e., data on HIV prevalence and associated risk factors among MSM  
44 before the implementation of the CHIP started [19]). Dar es Salaam is a fast-growing city and currently  
45 has a population of about 5 million. The estimated overall HIV prevalence among adults aged 15-49 is  
46 6.3% [2].  
47  
48  
49  
50  
51  
52  
53  
54  
55  
56  
57  
58  
59  
60



### **Study population**

MSM aged 18 and above were invited to participate in this survey. Participation required that the person had engaged in same-sex sex during the last 3 months preceding the survey. Also, participants needed to have had an address in, and lived in, Dar es Salaam for at least six months before recruitment commenced.

### **Sample size estimation**

We used the formula by Fleiss et al to calculate the sample size which aimed at achieving desired precision around point estimates for HIV infection among MSM [3]. According to the 2014 estimates for Dar es Salaam, the prevalence of HIV was 22% among MSM [4]. With a desired precision of 5%, taking into account a design effect (DEFF) of 3, based on the median DEFF found for key variables in similar RDS surveys in the region [5-9], the estimated sample size for this study was 759.

### **Sampling and recruitment**

Since there was no sampling frame for MSM, eligible study participants were recruited using respondent-driven sampling (RDS) [20]. RDS is a chain referral sampling method that incorporates a recruitment strategy to offset oversampling of certain population groups to minimize traditional snowballing bias [21]. Initially, selected members of the target population (referred to as “seeds”) refer other members of the same population to the study team for possible participation in a succession of waves until the desired sample size is achieved. Seeds were identified from different strata of MSM among our previous study contacts and through a meeting with the key population community advisory board. Characteristics that were taken into account in selection of seeds were age, socio-economic status, locality and sexual preference (preference for insertive or receptive anal sex). Recruitment networks and waves by age groups for this study are presented in figure 1. To attain equilibrium, recruitment waves ranged from 5-14 waves depending on the seed.

### **Data collection tool and data collection procedures**

A questionnaire validated in previous IBBS surveys conducted by our research group and others was used in this study [4]. The questionnaire contained questions on socio-demographic characteristics and sexual practices and was administered in Swahili, the language spoken by all Tanzanians. Seeds were identified and represented different groups of MSM. Participants were invited to a recruitment centre where they were provided with information about the study and asked if they would consent to participate in it. All study participants gave informed consent to take part in the research, and face-to-face interviews using Android tablets equipped with an Open Data Kit (ODK) for recording of data. Following the interviews, HIV pre-test counseling was carried out before participants were offered to test for HIV. All participants received health education and condoms after the interview and were compensated for their transportation to the study site at a rate of TZS 8000 (equivalent to US\$ 4) per person, as agreed upon with MSM representatives and approved by the ethical committee of the Muhimbili University of Health and Allied Sciences (MUHAS). Evidence indicate that water-based lubricants are effective in HIV prevention when used during anal sexual intercourse. However, we could not provide such commodities in this study due to the fact that they were not part of HIV preventive commodities listed in the 2016 revised National guideline for comprehensive package of HIV intervention for key population of which the project abided to.

### **Patients and public involvement**

Participants were involved in the design of the respondent driven sampling, study implementation and dissemination. Results from this study were presented in the key population advisor board meeting where the study population is represented.

### **Laboratory testing**

HIV testing followed the national testing algorithm. All samples were tested using the SD Bioline HIV-1/2 3.0 rapid test (Standard Diagnostics, Inc., Korea). Non-reactive results were considered negative for HIV whereas reactive results were subsequently tested with Uni-Gold™ HIV-1/2 (Trinity Biotech Plc, Ireland). Discrepant results were resolved by Enzygnost HIV Integral II Antibody/Antigen ELISA (Siemens, Germany).

### **Data analysis**

STATA version 15 and the RDSAT statistical package were used for analysis of data emanating from this survey. Data were weighted to control for network size and the clustering resulting from variations in selection probability and networks sizes [20]. Categorical variables were summarized by calculating weighted proportions, and differences in proportions were examined using  $\chi^2$  test. Median and inter-quartile range (IQR) were used to summarize continuous variables. Bivariate analyses and multivariate logistic regression models were used to measure associations between various risk factors and HIV infection. All exposure variables with a  $p \leq 0.2$  in bivariate analysis were included into a multivariate model. Crude and adjusted odds ratios (OR and AOR, respectively) for potential confounders with corresponding 95% confidence intervals (95%CI) are reported. All analyses were two-tailed and the significance level was set at 5%.

### **Ethical considerations**

The protocol for this survey was reviewed and approved by the ethical review committee of the Muhimbili University of health and allied sciences (MUHAS). Permission to conduct the study was thereafter sought from local authorities. All participants provided written informed consent to participate, separately for interviews and blood sample collection. Participants who tested positive for HIV were referred to care and treatment for further management.

## RESULTS

During the study period, 777 eligible MSM consented to participate in the study and gave blood for HIV testing. Their overall mean age was 26.0 years (standard deviation  $\pm$  7.1) with the largest proportion (34.8%) being 20-24 years old. A majority had completed either primary (44.8%) or secondary (48.4%) education. Three quarters (78.9%) reported to have never married, 71.1% were born and raised in Dar es Salaam, and half (50.6%) lived with their family. The median monthly income was 160,000 Tanzanian shillings (IQR 80,000-300,000), with a third (34.3%) reporting a monthly income above 200,000 shillings (Table 1).

**Table 1: Comparison of HIV prevalence by Socio-demographic Characteristics among MSM in Dar es Salaam, Tanzania (N=777)**

| Variable                    | Category           | n (%)      | HIV Positive n (%) | p-value |
|-----------------------------|--------------------|------------|--------------------|---------|
| Age groups (years)          | 15-19              | 134 (17.3) | 6 (4.45)           | 0.004   |
|                             | 20-24              | 271 (34.8) | 28 (10.3)          |         |
|                             | 25-29              | 152 (19.6) | 24 (15.8)          |         |
|                             | 30-34              | 105 (13.5) | 18 (17.0)          |         |
|                             | $\geq$ 35          | 115 (14.8) | 20 (17.4)          |         |
| Education level             | No formal          | 21 (2.7)   | 3 (14.3)           | 0.385   |
|                             | Primary            | 348 (44.8) | 43 (12.4)          |         |
|                             | Secondary          | 376 (48.4) | 43 (11.4)          |         |
|                             | Above secondary    | 32 (4.1)   | 7 (21.9)           |         |
| Marital Status              | Never married      | 613 (78.9) | 67 (10.9)          | 0.114   |
|                             | Married/cohabiting | 84 (10.8)  | 14 (16.7)          |         |
|                             | Divorced/separated | 80 (10.3)  | 35 (20.0)          |         |
| Time lived in Dar es Salaam | Born and raised    | 552 (71.1) | 63 (11.4)          | 0.380   |
|                             | Not born           | 225 (28.9) | 33 (14.7)          |         |
| Income past month (TZS)     | <50,000            | 133 (17.1) | 18 (13.5)          | 0.841   |
|                             | 50,000-120,000     | 151 (19.4) | 20 (13.3)          |         |
|                             | 120,001-200,000    | 227 (29.2) | 29 (12.8)          |         |
|                             | >200,000           | 266 (34.3) | 29 (10.9)          |         |

1  
2  
3  
4  
5  
6  
7  
8  
9

|                        |            |           |       |
|------------------------|------------|-----------|-------|
| Currently living Alone | 304 (39.1) | 39 (12.8) | 0.219 |
| with Family            | 393 (50.6) | 42 (10.7) |       |
| Boyfriend              | 50 (6.4)   | 11 (22.0) |       |
| Wife/girlfriend        | 30 (3.9)   | 4 (14.3)  |       |

10  
11

### Sexual practices and risks

12  
13  
14  
15  
16  
17  
18  
19  
20  
21  
22  
23  
24  
25  
26  
27  
28  
29  
30  
31  
32  
33  
34  
35  
36  
37  
38  
39

The median age at anal sexual debut was 16 years (IQR: 14-18). Half (51.1%) of the study participants reported to have had sex with a woman. Of those who had had sex with a non-paying male partner in the past month, more than half reported to have had either insertive (57.3%) or receptive (64.3%) sex with 2 or more partners. Use of condoms during last anal sex with a receptive non-paying partner was reported by 9.3%. Transactional sex was common among the study participants, with one-third (32.6%) reporting to have paid another man for sex during the past month prior to the survey, and nearly three quarters (69.5%) reported to have sold sex in the same period. A total of 80.2% had sold sex during the one-year period preceding the survey. While the proportion of participants who had used condoms with paid partners in the past month was 28.7%, condom use with paying partners in the past month was as high as 80.0%. About 15% of participants reported to have experienced condom breakage while having anal sex during the past month. Just above a quarter (26.2%) said they had engaged in group sex at least once in their lifetime (Table 2).

40  
41  
42  
43

**Table 2: HIV Prevalence by Selected Sexual Behavior Characteristics among MSM in Dar es Salaam, Tanzania (N=777)**

44  
45  
46  
47  
48  
49  
50  
51  
52  
53  
54  
55  
56  
57

| Variable                              | Category | N (%)      | HIV n(%)  | Positive | p-value |
|---------------------------------------|----------|------------|-----------|----------|---------|
| Age at first sexual intercourse       | <15      | 348 (43.4) | 49 (8.3)  | 0.979    |         |
|                                       | 16-18    | 266 (33.9) | 29 (8.0)  |          |         |
|                                       | >18      | 163 (22.7) | 18 (8.7)  |          |         |
| Had sex with a woman in past one year | Yes      | 377 (51.1) | 29 (5.5)  | 0.023    |         |
|                                       | No       | 400 (48.9) | 67 (11.2) |          |         |

58  
59  
60

| Variable                                                   | Category    | N (%)      | HIV n(%)  | Positive | p-value |
|------------------------------------------------------------|-------------|------------|-----------|----------|---------|
| Bought sex past one year                                   | Yes         | 320 (37.6) | 41 (9.6)  |          | 0.376   |
|                                                            | No          | 457 (62.4) | 55 (7.5)  |          |         |
| Sold sex past one year                                     | Yes         | 644 (80.2) | 84 (9.1)  |          | 0.108   |
|                                                            | No          | 133 (19.8) | 12 (5.0)  |          |         |
| Number of non-paying insertive male partners past month    | 1           | 109 (42.7) | 10 (7.9)  |          | 0.067   |
|                                                            | 2 and above | 184 (57.3) | 19 (10.3) |          |         |
| Number of non-paying receptive male partners in past month | 1           | 46 (35.7)  | 12 (29.3) |          | 0.489   |
|                                                            | 2 and above | 109 (64.3) | 37 (33.9) |          |         |
| Used a condom with last receptive non-paying partner       | Yes         | 73 (9.3)   | 25 (34.2) |          | 0.002   |
|                                                            | No          | 450 (90.7) | 54 (12.0) |          |         |
| Paid another man for anal sex past month                   | Yes         | 191 (32.6) |           | 13 (6.9) | 0.717   |
|                                                            | No          | 586 (67.4) | 30 (5.1)  |          |         |
| Used a condom with last paid male partner                  | No          | 554 (71.3) | 75 (13.5) |          | 0.059   |
|                                                            | Yes         | 223 (28.7) | 21 (9.4)  |          |         |
| Sold sex to another man in past month                      | Yes         | 540 (69.5) | 54 (10.0) |          | 0.771   |
|                                                            | No          | 237 (30.5) | 21 (8.9)  |          |         |
| Used a condom with last paying male partner                | No          | 108 (20.0) | 8(7.4)    |          | 0.041   |
|                                                            | Yes         | 432 (80.0) | 60 (13.9) |          |         |
| Had a condom break during anal sex in past month           | Yes         | 102 (15.1) | 31 (24.1) |          | <0.001  |
|                                                            | No          | 395 (84.9) | 49 (7.7)  |          |         |
| Ever participated in group sex                             | Yes         | 232 (26.2) | 43 (13.0) |          | 0.015   |
|                                                            | No          | 545 (73.8) | 53 (6.6)  |          |         |

## HIV prevalence

The weighted prevalence of HIV was 8.3% (95%CI: 6.3-10.9). The prevalence increased linearly with age and was significantly higher among those who had had sex with a woman in the past year (11.1% versus 5.5%, p=0.023), among those who had used a condom with their last non-paying partner (34.2% versus

12.0%,  $p=0.002$ ), among those who had not used a condom with last paying partner (13.9 versus 7.4%,  $p=0.041$ ) and among those reporting condom breakage during last anal sex (24.1% versus 7.7%,  $p<0.0001$ ). Having engaged in group sex was also associated with higher HIV prevalence (13.0% versus 6.6%,  $p=0.015$ ).

### Comparison of HIV prevalence between 2014 and 2017

In 2014, 753 MSM participated in a survey conducted by the same research group that carried out the present study. The mean age in 2014 was 26.5 years (95%CI: 26.1-27.1) while the mean age in 2017 was 26.0 years (95%CI: 25.5-26.5). The age composition of samples therefore did not differ between the two surveys ( $p<0.0001$ ). No significant statistical differences in other socio-demographic characteristics were observed between the two samples (Table 3). However, the estimated HIV prevalence in 2017 was less than half that of 2014 (8.3% versus 22.3%,  $p<0.001$ )

**Table 3: Comparison of Socio-Demographic Characteristics of the 2014 and 2017 Survey Samples**

| Demographic Characteristic            | 2014 (%) | 2017 (%) |
|---------------------------------------|----------|----------|
| <b>Age (years)</b>                    |          |          |
| ≤ 24                                  | 46.3     | 52.1     |
| 25-34                                 | 41.2     | 33.1     |
| ≥ 35                                  | 12.4     | 14.8     |
| <b>Level of education</b>             |          |          |
| No formal education                   | 1.1      | 2.7      |
| Some or completed primary education   | 42.9     | 44.8     |
| Some or completed secondary education | 52.9     | 48.4     |
| Post-secondary education              | 3.1      | 4.1      |
| <b>Marital status</b>                 |          |          |
| Single                                | 83.2     | 78.9     |
| Married/cohabiting                    | 5.9      | 10.8     |
| Separated/divorced/widower            | 6.9      | 10.3     |
| <b>Current living arrangement</b>     |          |          |
| With family                           | 52.5     | 50.6     |
| Alone                                 | 35.3     | 39.1     |
| Boyfriend                             | 5.7      | 6.4      |
| Wife/girlfriend                       | 6.0      | 3.9      |
| <b>Occupation</b>                     |          |          |

|               |      |      |
|---------------|------|------|
| Petty trader  | 39.8 | 39.1 |
| Employed      | 17.9 | 22.4 |
| Self employed | 33.2 | 42.3 |
| Other         | 6.5  | 9.3  |

### Independent risk factors for HIV

The results of bivariate and multivariate logistic regression of independent risk factors for HIV infection are presented in Table 4 and 5. HIV prevalence increased with age, with men aged 25 years and above having 4 times higher risk of infection than those who were between 15 and 19 years. Having had 2 or more receptive non-paying male sexual partners in the last month before the survey was associated with higher odds of HIV infection (AOR=3.0; 95%CI: 1.8-12.0). Having used a condom during last sex with a non-paying partner was also associated with increased risk of testing positive for HIV (AOR=4.1; 95%CI: 1.4-7.8) and those who had ever engaged in group sex had 3 times higher odds of being HIV positive (AOR=3.4; 95%CI: 1.7-13.6). On the other hand, condom use during last anal sex with a paying partner (AOR=0.4, 95%CI: 0.2-0.9) was associated with 60% lower odds of HIV infection.

**Table 4: Weighted Logistic Regression Modelling of the Association between Socio-Demographic Factors and HIV among MSM in Dar es Salaam, Tanzania**

| Variable           | Category        | OR (95%CI)    | AOR (95%CI) <sup>a</sup> | p-value* |
|--------------------|-----------------|---------------|--------------------------|----------|
| Age groups (years) | 15-19           | 1             | 1                        |          |
|                    | 20-24           | 2.3 (0.9;5.4) | 2.3 (0.9;5.6)            | 0.061    |
|                    | 25-29           | 3.5 (1.5;8.4) | 3.9 (1.6;9.5)            | 0.003    |
|                    | 30-34           | 3.8 (1.6;9.3) | 4.1(1.6;10.4)            | 0.003    |
|                    | 35+             | 3.9 (1.6;9.3) | 4.0 (1.4;5.3)            | 0.004    |
| Education level    | No formal       | 1             |                          |          |
|                    | Primary         | 0.9 (0.3;2.5) |                          |          |
|                    | Secondary       | 1.8 (0.3;2.4) |                          |          |
|                    | Above secondary | 1.5 (0.5;5.3) |                          |          |



|    |                             |                    |              |               |       |
|----|-----------------------------|--------------------|--------------|---------------|-------|
| 1  |                             |                    |              |               |       |
| 2  |                             |                    |              |               |       |
| 3  | Marital Status              | Never married      | 1            | 1             |       |
| 4  |                             | Married/cohabiting | 0.5(0.9;1.6) | 1.0 (0.5;2.2) | 0.990 |
| 5  |                             | Divorced/separated | 1.7(1.1;2.9) | 1.3 (0.7;2.3) | 0.375 |
| 6  |                             |                    |              |               |       |
| 7  |                             |                    |              |               |       |
| 8  | Time lived in Dar es salaam | Born and raised    | 0.4(0.1;1.1) | 0.4 (0.1;1.3) | 0.117 |
| 9  |                             | 1-5 years          | 0.6(0.2;1.0) | 0.6 (0.2;1.3) | 0.386 |
| 10 |                             | 6 and above years  | 0.5(0.2;1.6) | 0.4 (0.1;1.2) | 0.147 |
| 11 |                             |                    |              |               |       |
| 12 |                             |                    |              |               |       |
| 13 |                             |                    |              |               |       |
| 14 | Income past month (TZS)     | <50,000            | 1            |               |       |
| 15 |                             | 50,000-120,000     | 1.0(0.5;1.8) |               |       |
| 16 |                             | 121,000-200,000    | 0.9(0.6;1.6) |               |       |
| 17 |                             | >200,000           | 0.8(0.5;1.4) |               |       |
| 18 |                             |                    |              |               |       |
| 19 | Currently living with       | Alone              | 1            |               |       |
| 20 |                             | Family             | 0.8(0.6;1.5) |               |       |
| 21 |                             | Boyfriend          | 1.7(0.9;3.1) |               |       |
| 22 |                             | Wife/girl friend   | 1.1(0.4;2.9) |               |       |
| 23 |                             |                    |              |               |       |

<sup>z</sup> Adjusted for all variables in the table with p-value of  $\leq 0.2$  in the bivariate model; \* p-value for adjusted OR

**Table 5: Weighted Logistic Regression Modelling of Association between Sex-Related Risk Factors and HIV among MSM in Dar es Salaam, Tanzania**

| Variable                                                                  | Category    | OR (95%CI)    | AOR (95%CI) <sup>z</sup> | p-value* |
|---------------------------------------------------------------------------|-------------|---------------|--------------------------|----------|
| Age at sexual debut                                                       | $\leq 15$   | 1             |                          |          |
|                                                                           | 16-18       | 0.8(0.5;1.2)  |                          |          |
|                                                                           | >18         | 0.8(0.5;1.3)  |                          |          |
| Had sex with a woman past 12 months                                       | No          | 1             | 1.                       |          |
|                                                                           | Yes         | 0.5(0.3;0.7)  | 0.9(0.6;1.2)             | 0.861    |
| Bought sex past one year                                                  | No          | 1             | 1                        |          |
|                                                                           | Yes         | 1.1(0.7;1.4)  | 1.7(0.6;3.0)             | 0.370    |
| Sold sex past one year                                                    | Yes         | 1             |                          |          |
|                                                                           | No          | 0.8(0.2;5.1)  |                          |          |
| Number of male receptive partners where no payment is involved past month | 1           | 1             | 1                        |          |
|                                                                           | 2 and above | 1.6(1.1;7.5)  | 3.0(1.8;12.0)            | 0.000    |
| Number of non-paying insertive male partners past month                   | 1           | 1             | 1                        |          |
|                                                                           | 2 and above | 1.5(0.5;11.2) | 1.6(0.4;23.1)            | 0.531    |
| Used a condom with last receptive non-paying partner                      | No          | 1             | 1                        |          |
|                                                                           | Yes         | 3.1(1.2;7.2)  | 4.1(1.4;7.8)             | 0.000    |

|                                                  |     |               |               |       |
|--------------------------------------------------|-----|---------------|---------------|-------|
| Paid another man for anal sex past month         | No  | 1             | 1             |       |
|                                                  | Yes | 1.5(0.5;9.2)  | 1.6(0.6;11.8) | 0.142 |
| Used a condom with last paid male partner        | Yes | 1             | 1             |       |
|                                                  | No  | 1.1(0.5;2.1)  | 1.5(0.7;3.0)  | 0.284 |
| Used a condom with last paying male partner      | Yes | 1             | 1             |       |
|                                                  | No  | 0.6(0.3;1.0)  | 0.4(0.2;0.9)  | 0.000 |
| Sold sex to another man past month               | No  | 1             | 1             |       |
|                                                  | Yes | 1.3(0.7;2.2)  | 2.5(0.7;8.5)  | 0.156 |
| Had a condom break during anal sex in past month | No  | 1             | 1             |       |
|                                                  | Yes | 1.5(1.7;3.6)  | 1.2(0.7;2.1)  | 0.431 |
| Ever participated in group sex                   | No  | 1             | 1             |       |
|                                                  | Yes | 3.1(1.2;15.6) | 3.4(1.7;13.6) | 0.000 |

<sup>z</sup> Adjusted for all variables in the table with p-value of  $\leq 0.2$  in the bivariate model; \* p-value for adjusted OR

## DISCUSSION

This study examined HIV prevalence among MSM in Dar es Salaam after the National guideline for comprehensive package of HIV intervention for key population (CHIP) had been under implementation in Tanzania since 2014. The estimated HIV prevalence was 8.3% (95%CI: 6.3-10.9), as compared to 22.3% (95%CI: 18.7-26.4) in 2013 [4]. This observation suggests that the HIV prevalence in this population has decreased by 62 percent over the past 5 years. The observed decline is substantial and statistically significant. The socio-demographic characteristics of the 2014 and 2017 survey samples did not differ significantly, suggesting that differences in the study population structure may not explain the observed decline. The difference from 2014 would be even greater if our current estimates were compared to another study conducted among MSM in Dar es Salaam that year. That study (albeit based on a sample of only 200 MSM) reported an HIV prevalence of 30.2% among MSM [6].

1  
2  
3 The present survey is the first study ever to report declining HIV prevalence among MSM in Tanzania.  
4  
5 The decline echoes the dynamic of the overall HIV situation in Tanzania, where HIV prevalence in the  
6  
7 general population has been steadily decreasing over the past decade, from 7.0% in 2003 to 4.7% in 2016  
8  
9 [2, 3]. Similar trends of decreasing HIV prevalence in key population groups alongside that in the general  
10  
11 population have also been reported elsewhere [7, 9, 22].  
12  
13

14  
15 Despite the reported decrease, the HIV prevalence among MSM is still twice as high as that among men  
16  
17 in the general population in Dar es Salaam. For this reason, recent calls for continued efforts to address  
18  
19 HIV in high-risk populations made by the authors of a systematic review of the global epidemiology of  
20  
21 HIV among MSM [8] is still very relevant also in Dar es Salaam.  
22  
23

24  
25 Sexual practices associated with HIV risk continue to be common among MSM in Dar es Salaam, and  
26  
27 were significantly associated with HIV seropositivity. A substantial proportion of men have multiple  
28  
29 sexual partnerships and engage in group sex, as has also been reported earlier both in Tanzania and  
30  
31 elsewhere in Sub-Saharan Africa [4, 5, 12, 23, 24].  
32

33  
34 Men aged 25 and above had higher HIV prevalence than those who were younger in this study, similar  
35  
36 to what has been reported earlier in Dar es Salaam and elsewhere in Africa [4, 5, 10, 11]. A higher HIV  
37  
38 prevalence among older men may reflect accumulation of risk over time and/or higher survival following  
39  
40 ongoing efforts to improve linkage to care for people testing positive for HIV. The most recent AIDS  
41  
42 indicator survey in Tanzania reported that 90.9% of persons who were between 15 and 64 years of age  
43  
44 and who knew their HIV status indicated that they were on antiretroviral treatment, and 87.7% were  
45  
46 virally suppressed [2]. However, HIV testing coverage in the country is still low with only 52.2% of  
47  
48 people living with HIV knowing their HIV status (in the 15-64 age bracket) [2].  
49  
50

51  
52 More than half of our study participants reported to have had sex with more than 2 partners. Moreover,  
53  
54 transactional sex was very common in this population, with 64% reporting to have paid for sex during  
55  
56  
57

1  
2  
3 the past month, and 79% reporting to have sold sex during the last month. However, a striking finding  
4 was that condom use was very common among MSM who engaged in commercial sex. Condom use  
5 during last commercial sex was reported by a total of 80% of the study participants as compared to 49%  
6 in 2014 [4]. A significant increase in condom use among MSM following preventive education has  
7 recently been reported in a cohort of MSM in West Africa [22]. We found that condom use with paying  
8 partners (commercial sex) was associated with a 60% lower likelihood of HIV infection in this study.  
9 This increase in protected commercial sex may partly explain the decreased HIV prevalence observed  
10 in this study.  
11  
12  
13  
14  
15  
16  
17  
18  
19  
20

21 On the other hand, condom use with regular (non-paying) partners was low in this study (9.3%), but  
22 comparable to that found in other studies of key populations in Tanzania [25]. Low perceived  
23 susceptibility and a sense of trusting a regular partner are factors that have been associated with condom-  
24 less sex [26, 27]. Worth noting in this study is the finding that condom use with regular partners was  
25 significantly associated with HIV seropositivity. It is possible that this reflects that some HIV positive  
26 MSM use condoms when they engage in sex to ensure the safety of their partners. This has also been  
27 reported in other studies in Asia and Africa [16, 28, 29].  
28  
29  
30  
31  
32  
33  
34  
35  
36

37 As was the case in our 2014 study among MSM in Dar es Salaam, nearly one-third of the study  
38 participants reported to have engaged in group sex [4], and group sex was associated with HIV infection.  
39 This underscores the need for tailored preventive messaging addressing safer group sex in implementing  
40 the CHIP [2, 17].  
41  
42  
43  
44  
45

46 The results of this study should be interpreted in light of the following limitations. Firstly, the cross-  
47 sectional nature of the survey limit causal inference of the risk factors for HIV infection identified.  
48 However, most of the risk factors reported have also been studied and reported in well-designed  
49 longitudinal studies. Secondly, participants were recruited using respondent driven sampling  
50  
51  
52  
53  
54  
55  
56  
57  
58  
59  
60

1  
2  
3 methodology which is not a random sampling methodology. Despite the fact that we used special  
4 statistical software (RDSAT) and controlled for network sizes during analysis, we acknowledge the  
5 potential for bias. Thirdly, we collected sensitive sexual behavior data which are subject to desirability  
6 bias. The design of the questionnaire, interviewers training, privacy setting of interview venues and  
7 establishment of good rapport with participants were put in place to reduce desirability reporting. And  
8 fourthly, we have attributed the observed decrease in HIV prevalence to the implementation of the  
9 National guideline for comprehensive package of HIV intervention for key population (CHIP) based on  
10 the before and after design consideration. We acknowledge that the 2014 and the current survey of 2017  
11 were not designed to assess the effectiveness of CHIP implementation and our conclusion may be  
12 confounded by many factors.  
13  
14

15  
16  
17 On the other hand, this survey was the largest MSM survey in Tanzania and Africa at large and included  
18 seeds from various MSM strata (demographic and sexual characteristics) with potentially high external  
19 validity of the results presented.  
20  
21

## 22 **CONCLUSION**

23  
24  
25 The HIV prevalence among MSM in Dar es Salaam has decreased by more than half over the past 5 years,  
26 coinciding with the implementation of the CHIP in Tanzania. Despite of the considerable decrease, the  
27 HIV prevalence in this population still remains twice as high as that among men in general. More condom  
28 protected anal sex could have played a role in the declining HIV prevalence among MSM. Efforts to  
29 promote safer sex among men who engage in multiple sexual partnerships and group sex are called for.  
30  
31 The roll out of new intervention measures, such as pre-exposure prophylaxis, could significantly  
32 contribute in the ongoing efforts to end the epidemic  
33  
34  
35  
36  
37  
38  
39  
40  
41  
42  
43  
44  
45  
46  
47  
48  
49  
50  
51  
52  
53  
54  
55  
56  
57  
58  
59  
60

### Funding

The work was supported by funding from Danida Fellowship Centre (DFC) through Project No. 16-P03-TAN and Global Fund to Fight AIDS, Tuberculosis, and Malaria through Tanzania National AIDS Control Programme.

### Competing interest statement

Authors declare that they have no competing interest.

### Authors contributions

AM analyzed data, interpreted results and drafted the manuscript. EJM designed the study, analyzed data and interpreted results. KM, GH, TL, NM, AR, MTL, DM and BT designed the study and interpreted the results. SL and MM, collected data and interpreted the results. All authors revised and approved the final version of the manuscript.

### Data availability

Data are available from the corresponding authors upon reasonable request.

### Participants consent

All participants provided written informed consent before interview or blood specimen collection.

Figure 1: Recruitment networks by age groups

### REFERENCES

1. GBD HC: **Estimates of global, regional, and national incidence, prevalence, and mortality of HIV, 1980-2015: the Global Burden of Disease Study 2015.** *Lancet HIV.* 2016 Aug;3(8):. *Lancet HIV* 2016, 3(8):e408.
  2. NBS: **Tanzania HIV Impact Survey 2016-2017: Preliminary Findings.** In. Edited by Statistics. NBo. Dar es Salaam: NBS, NACP; 2017.
  3. Fleiss J, Levin B, Paik M. *Statistical Methods for Rates and Proportions.* 3<sup>rd</sup> Edition. Published by John Wiley & Sons, 2003.
- Zanzibar AIDS Commission (ZAC) NBoSN, Office of the Chief Government Statistician (OCGS), ICF International: **Tanzania HIV/AIDS and Malaria Indicator Survey 2011-2012. Dar es salaam, Tanzania:** . In. Dar es Salaam, Tanzania: Zanzibar AIDS Commission (ZAC), National Bureau of Statistics (NBS), Office of the Chief Government Statistician (OCGS), ICF International; 2013.

- 1
  - 2
  - 3
  4. Mmbaga EJ MK, Leyna GH, Mpembeni R, Leshabari MT: **HIV Prevalence and Associated Risk Factors Among Men Who Have Sex With Men in Dar es Salaam, Tanzania.** *J Acquir Immune Defic Syndr* 2018, **77**(3):243-249.
  - 5
  - 6
  7. Mmbaga EJ MK, Makyao N, Mpembeni R, Leshabari MT: **HIV and STI s among men who have sex with men in Dodoma municipality, Tanzania: a cross-sectional study.** *Sex Transm Infect* 2017, **93**(5):314-319.
  - 8
  - 9
  - 10
  - 11
  - 12
  - 13
  - 14
  - 15
  - 16
  - 17
  - 18
  - 19
  - 20
  - 21
  - 22
  - 23
  - 24
  - 25
  - 26
  - 27
  - 28
  - 29
  - 30
  - 31
  - 32
  - 33
  - 34
  - 35
  - 36
  - 37
  - 38
  - 39
  - 40
  - 41
  - 42
  - 43
  - 44
  - 45
  - 46
  - 47
  - 48
  - 49
  - 50
  - 51
  - 52
  - 53
  - 54
  - 55
  - 56
  - 57
  - 58
  - 59
  - 60
6. Ross MW NJ, Ahaneku HO, Mbwambo J, McClelland RS, McCurdy SA **High HIV seroprevalence, rectal STIs and risky sexual behavior in men who have sex with men in Dar es Salaam and Tanga, Tanzania.** *BMJ Open* 2014, **4**(8):e006175.
7. Baral SD GA, Holland C, Papworth E.: **The epidemiology of HIV among men who have sex with men in countries with generalized HIV epidemics.** *Curr Opin HIV AIDS* 2014, **9**(2):156–167. .
8. Beyrer C BS, van Griensven F, Goodreau SM, Chariyalertsak S, Wirtz AL, et al.: **Global epidemiology of HIV infection in men who have sex with men.** *Lancet* 2012, **380**(9839):367–377.
9. Djomand G QS, Sullivan PS **HIV epidemic among key populations in west Africa.** *Curr Opin HIV AIDS* 2014, **9**(5):506-513.
10. Ferré VM G-KF, Collin G, Dagnra AC, Le Hingrat Q, Jaquet A, Salou M, Descamps D, Charpentier C, Ekouevi DK.: **Prevalence of Human Papillomavirus, HIV and other sexually transmitted infections among men having sex with men in Togo: a national cross-sectional survey.** *Clin Infect Dis* 2019, **6**( doi: 10.1093/cid/ciy1012.).
11. Hladik W BJ, Ssenkusu JM, Opio A, Tappero JW, Hakim A, et al. : **HIV Infection among Men Who Have Sex with Men in Kampala, Uganda—A Respondent Driven Sampling Survey.** *PLoS One* 2012, **7**(5).
12. Ouedraogo HG K-ZO, Grosso A, Goodman S, Samadoulougou BC, Tarnagda G, Baguiya A, Tiendrebeogo S, Lougue M, Sawadogo N, Traore Y, Barro N, Baral S, Kouanda S. : **Human immunodeficiency virus (HIV) among men who have sex with men: results of the first integrated biological and behavioral survey in Burkina Faso, West Africa.** . *BMC Public Health* 2019, **19**(1):5. doi: 10.1186/s12889-12018-16361-12881.
13. Dahoma M JL, Holman A: **HIV and related risk behavior among men who have sex with men in Zanzibar, Tanzania: results of a behavioral surveillance survey.** *AIDS Behav* 2011, **15**:186–196.
14. Baral S SF, Cleghorn F, Beyrer C.: **Elevated risk for HIV infection among men who have sex with men in low- and middle-income countries 2000-2006: a systematic review.** *PLoS Med* 2007, **4**(12):e339.
15. Dahoma MJ SA, Abdool R: **HIV and substance abuse: the dual epidemics challenging Zanzibar.** *African Journal of Drugs and Alcohol Studies* 2006, **5**:129–138.
16. Merrigan M AA, Afolabi B, Chabikuli ON, Onyekwena O, Eluwa G, et al.: **HIV prevalence and risk behaviours among men having sex with men in Nigeria.** *Sex Transm Infect* 2011, **87**(1):65–70.
17. UNAIDS: **90–90–90—an ambitious treatment target to help end the AIDS epidemic.** . In: <http://www.unaids.org/en/resources/documents/2014/90-90-90> (accessed September 10, 2019). Geneva, Switzerland: UNAIDS; 2014.
18. Programme NAC: **Comprehensive Guideline for HIV prevention among Key Population in Tanzania.** . In. Dar es Salaam, Tanzania: NACP; 2016.

19. Mmbaga EJ LG, Mpembeni R, Moen K, Makyao N, Leshabari M: **Intergrated Biobehavioral Survey among men who have sex with men in dar es salaam, Tanzania**. In. Dar es Salaam, Tanzania: National AIDS Control Program, MUHAS; 2014.
20. DD. H: **Respondent-Driven Sampling II: Deriving Valid Population Estimates from Chain-Referral Samples of Hidden Populations**. *Soc Probl* 2002, **49**(1):11–34.
21. DD H: **Snowball versus respondent-driven sampling**. *Sociol Methodol* 2011, **41**(1):355-366.
22. Coulaud PJ S-TL, Mimi M, Maradan G et al.: **Changes in risky sexual behaviours among West African MSM enrolled in a quarterly HIV testing and counselling prevention programme**. *Sex Transm Infect* 2019, **2019 Aug 1**. pii: [sextrans-2018-053892](https://doi.org/10.1093/sxt/0000000000000538). .
23. Mgbako O PS, Callander D, Brinker D, Kuhner C, Carrico A: **Transactional sex, condomless anal sex, and HIV risk among men who have sex with men**. *Int J STD & AIDS* 2019, **30**(8):795–801.
24. Coulaud PJ S-TL, m Mimi M, M'madi Mrenda B, Maradan G et al. : **Combined Sexual Behavioral Profiles in HIV-Seronegative Men Who have Sex with Men in West Africa** *Arch Sex Behav* 2019, **2019 Aug 9**. doi: [10.1007/s10508-019-01513-z](https://doi.org/10.1007/s10508-019-01513-z). .
25. Mbita G MA, Plotkin M, Casalini C, Shao A, Lija G, Boyee D, Ramadhan A, Makyayo N, Mlange R, Bandio R, Christofeld M, Komba A.: **Consistent Condom Use and Dual Protection Among Female Sex Workers: Surveillance Findings from a Large-Scale, Community-Based Combination HIV Prevention Program in Tanzania** *AIDS Behav* 2019, **2019 Aug 23**. doi: [10.1007/s10461-019-02642-1](https://doi.org/10.1007/s10461-019-02642-1).
26. Manjengwa PG MK, Musekiwa A, Kuonza LR. : **Cognitive and behavioural determinants of multiple sexual partnerships and condom use in South Africa: Results of a national survey**. *South Afr J HIV Med* 2019, **20**(1):868. doi: [810.4102/sajhivmed.v4120i4101.4868](https://doi.org/10.4102/sajhivmed.v4120i4101.4868). .
27. Giano Z KK, Durham AR, Currin JM, Wheeler DL, Croff JM, Hubach RD.: **Factors Associated with Condom Use among a Sample of Men Who Have Sex with Men (MSM) Residing in Rural Oklahoma**. *J Homosex* 2019, **May 24**:1-21. doi: [10.1080/00918369.2019.1616430](https://doi.org/10.1080/00918369.2019.1616430). .
28. Deuba K KV, Koirala S for the CAT-S group, et al: **Condom use behaviour among people living with HIV: a seven-country community-based participatory research in the Asia-Pacific region**. *Sex Transm Infect* 2018, **94**:200-205. .
29. Tobin-West CI NS, Maduka O, Oranu E, Onyekwere VN, Tamuno I. : **Exploring the HIV-risk practices of men who have sex with men in Port Harcourt city, Nigeria**. *Ann Trop Med Public Health* 2017, **10**(3):551.



1  
2  
3  
4  
5  
6  
7  
8  
9  
10  
11  
12  
13  
14  
15  
16  
17  
18  
19  
20  
21  
22  
23  
24  
25  
26  
27  
28  
29  
30  
31  
32  
33  
34  
35  
36  
37  
38  
39  
40  
41  
42  
43  
44  
45  
46  
47  
48  
49  
50  
51  
52  
53  
54  
55  
56  
57  
58  
59  
60

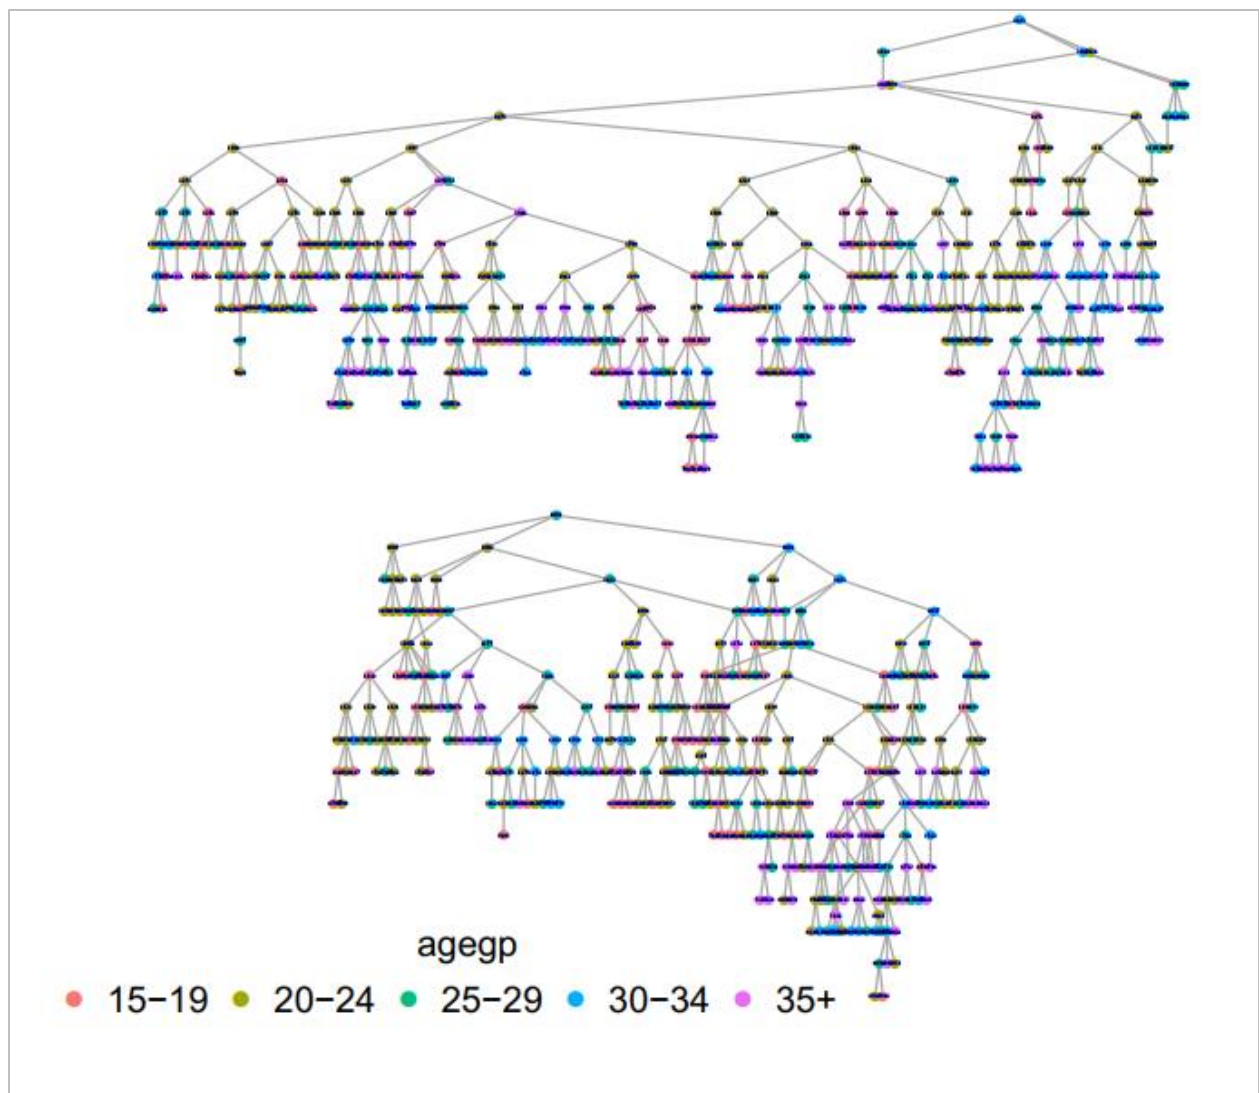

**Figure 1: Recruitment networks by age groups**

Only

STROBE Statement—Checklist of items that should be included in reports of *cross-sectional studies*

|                              | Item No | Recommendation                                                                                                                                                                                               | Page No |
|------------------------------|---------|--------------------------------------------------------------------------------------------------------------------------------------------------------------------------------------------------------------|---------|
| <b>Title and abstract</b>    | 1       | (a) Indicate the study's design with a commonly used term in the title or the abstract                                                                                                                       | 01      |
|                              |         | (b) Provide in the abstract an informative and balanced summary of what was done and what was found                                                                                                          | 02      |
| <b>Introduction</b>          |         |                                                                                                                                                                                                              |         |
| Background/rationale         | 2       | Explain the scientific background and rationale for the investigation being reported                                                                                                                         | 03      |
| Objectives                   | 3       | State specific objectives, including any prespecified hypotheses                                                                                                                                             | 04      |
| <b>Methods</b>               |         |                                                                                                                                                                                                              |         |
| Study design                 | 4       | Present key elements of study design early in the paper                                                                                                                                                      | 04      |
| Setting                      | 5       | Describe the setting, locations, and relevant dates, including periods of recruitment, exposure, follow-up, and data collection                                                                              | 04      |
| Participants                 | 6       | (a) Give the eligibility criteria, and the sources and methods of selection of participants                                                                                                                  | 05      |
| Variables                    | 7       | Clearly define all outcomes, exposures, predictors, potential confounders, and effect modifiers. Give diagnostic criteria, if applicable                                                                     | 6-7     |
| Data sources/<br>measurement | 8*      | For each variable of interest, give sources of data and details of methods of assessment (measurement). Describe comparability of assessment methods if there is more than one group                         | 5-7     |
| Bias                         | 9       | Describe any efforts to address potential sources of bias                                                                                                                                                    | 5-7     |
| Study size                   | 10      | Explain how the study size was arrived at                                                                                                                                                                    | 05      |
| Quantitative variables       | 11      | Explain how quantitative variables were handled in the analyses. If applicable, describe which groupings were chosen and why                                                                                 | 6-7     |
| Statistical methods          | 12      | (a) Describe all statistical methods, including those used to control for confounding                                                                                                                        | 6-7     |
|                              |         | (b) Describe any methods used to examine subgroups and interactions                                                                                                                                          | 6-7     |
|                              |         | (c) Explain how missing data were addressed                                                                                                                                                                  | -       |
|                              |         | (d) If applicable, describe analytical methods taking account of sampling strategy                                                                                                                           | 6-7     |
|                              |         | (e) Describe any sensitivity analyses                                                                                                                                                                        | 6-7     |
| <b>Results</b>               |         |                                                                                                                                                                                                              |         |
| Participants                 | 13*     | (a) Report numbers of individuals at each stage of study—eg numbers potentially eligible, examined for eligibility, confirmed eligible, included in the study, completing follow-up, and analysed            | 7       |
|                              |         | (b) Give reasons for non-participation at each stage                                                                                                                                                         | 7-8     |
|                              |         | (c) Consider use of a flow diagram                                                                                                                                                                           | -       |
| Descriptive data             | 14*     | (a) Give characteristics of study participants (eg demographic, clinical, social) and information on exposures and potential confounders                                                                     | 8       |
|                              |         | (b) Indicate number of participants with missing data for each variable of interest                                                                                                                          | 8       |
| Outcome data                 | 15*     | Report numbers of outcome events or summary measures                                                                                                                                                         | 9       |
| Main results                 | 16      | (a) Give unadjusted estimates and, if applicable, confounder-adjusted estimates and their precision (eg, 95% confidence interval). Make clear which confounders were adjusted for and why they were included | 12      |

1  
2  
3  
4  
5  
6  
7  
8  
9  
10  
11  
12  
13  
14  
15  
16  
17  
18  
19  
20  
21  
22  
23  
24  
25  
26  
27  
28  
29  
30  
31  
32  
33  
34  
35  
36  
37  
38  
39  
40  
41  
42  
43  
44  
45  
46  
47  
48  
49  
50  
51  
52  
53  
54  
55  
56  
57  
58  
59  
60

|                          |    |                                                                                                                                                                            |       |
|--------------------------|----|----------------------------------------------------------------------------------------------------------------------------------------------------------------------------|-------|
|                          |    | (b) Report category boundaries when continuous variables were categorized                                                                                                  | 12-13 |
|                          |    | (c) If relevant, consider translating estimates of relative risk into absolute risk for a meaningful time period                                                           | 12-13 |
| Other analyses           | 17 | Report other analyses done—eg analyses of subgroups and interactions, and sensitivity analyses                                                                             | 12-13 |
| <b>Discussion</b>        |    |                                                                                                                                                                            |       |
| Key results              | 18 | Summarise key results with reference to study objectives                                                                                                                   | 14    |
| Limitations              | 19 | Discuss limitations of the study, taking into account sources of potential bias or imprecision. Discuss both direction and magnitude of any potential bias                 | 03    |
| Interpretation           | 20 | Give a cautious overall interpretation of results considering objectives, limitations, multiplicity of analyses, results from similar studies, and other relevant evidence | 16    |
| Generalisability         | 21 | Discuss the generalisability (external validity) of the study results                                                                                                      | 16    |
| <b>Other information</b> |    |                                                                                                                                                                            |       |
| Funding                  | 22 | Give the source of funding and the role of the funders for the present study and, if applicable, for the original study on which the present article is based              | 16    |

\*Give information separately for exposed and unexposed groups.

**Note:** An Explanation and Elaboration article discusses each checklist item and gives methodological background and published examples of transparent reporting. The STROBE checklist is best used in conjunction with this article (freely available on the Web sites of PLoS Medicine at <http://www.plosmedicine.org/>, Annals of Internal Medicine at <http://www.annals.org/>, and Epidemiology at <http://www.epidem.com/>). Information on the STROBE Initiative is available at [www.strobe-statement.org](http://www.strobe-statement.org).
